# Supplementary material for: Safety of a silicone elastomer vaginal ring as potential microbicide delivery method in African women: A Phase 1 randomized trial
Source: PubMed Central journal article supplement (PMC5973569; doi:10.1371/journal.pone.0196904), 2018-05-29

**S1 Fig.** CONSORT 2010 checklist of information to include when reporting a randomized trial

| Section/Topic                                        | Item No | Checklist item                                                                                                                                                                              | Reported on page No |
|------------------------------------------------------|---------|---------------------------------------------------------------------------------------------------------------------------------------------------------------------------------------------|---------------------|
| <b>Title and abstract</b>                            |         |                                                                                                                                                                                             |                     |
|                                                      | 1a      | Identification as a randomised trial in the title                                                                                                                                           | 1                   |
|                                                      | 1b      | Structured summary of trial design, methods, results, and conclusions (for specific guidance see CONSORT for abstracts [21,31])                                                             | 2                   |
| <b>Introduction</b>                                  |         |                                                                                                                                                                                             |                     |
| Background and objectives                            | 2a      | Scientific background and explanation of rationale                                                                                                                                          | 4                   |
|                                                      | 2b      | Specific objectives or hypotheses                                                                                                                                                           | 5                   |
| <b>Methods</b>                                       |         |                                                                                                                                                                                             |                     |
| Trial design                                         | 3a      | Description of trial design (such as parallel, factorial) including allocation ratio                                                                                                        | 5                   |
|                                                      | 3b      | Important changes to methods after trial commencement (such as eligibility criteria), with reasons                                                                                          | 9                   |
| Participants                                         | 4a      | Eligibility criteria for participants                                                                                                                                                       | 6                   |
|                                                      | 4b      | Settings and locations where the data were collected                                                                                                                                        | 5, 8, 10            |
| Interventions                                        | 5       | The interventions for each group with sufficient details to allow replication, including how and when they were actually administered                                                       | 5                   |
| Outcomes                                             | 6a      | Completely defined pre-specified primary and secondary outcome measures, including how and when they were assessed                                                                          | 7                   |
|                                                      | 6b      | Any changes to trial outcomes after the trial commenced, with reasons                                                                                                                       | -                   |
| Sample size                                          | 7a      | How sample size was determined                                                                                                                                                              | 9                   |
|                                                      | 7b      | When applicable, explanation of any interim analyses and stopping guidelines                                                                                                                | -                   |
| <b>Randomisation:</b>                                |         |                                                                                                                                                                                             |                     |
| Sequence generation                                  | 8a      | Method used to generate the random allocation sequence                                                                                                                                      |                     |
|                                                      | 8b      | Type of randomisation; details of any restriction (such as blocking and block size)                                                                                                         | 5                   |
| Allocation concealment mechanism                     | 9       | Mechanism used to implement the random allocation sequence (such as sequentially numbered containers), describing any steps taken to conceal the sequence until interventions were assigned | 5                   |
| Implementation                                       | 10      | Who generated the random allocation sequence, who enrolled participants, and who assigned participants to interventions                                                                     | 5                   |
| Blinding                                             | 11a     | If done, who was blinded after assignment to interventions (for example, participants, care providers, those assessing outcomes) and how                                                    |                     |
|                                                      | 11b     | If relevant, description of the similarity of interventions                                                                                                                                 | 5                   |
| Statistical methods                                  | 12a     | Statistical methods used to compare groups for primary and secondary outcomes                                                                                                               |                     |
|                                                      | 12b     | Methods for additional analyses, such as subgroup analyses and adjusted analyses                                                                                                            | 9                   |
| <b>Results</b>                                       |         |                                                                                                                                                                                             |                     |
| Participant flow (a diagram is strongly recommended) | 13a     | For each group, the numbers of participants who were randomly assigned, received intended treatment, and were analysed for the primary outcome                                              | 5, 10               |
|                                                      | 13b     | For each group, losses and exclusions after randomisation, together with reasons                                                                                                            | 10                  |
| Recruitment                                          | 14a     | Dates defining the periods of recruitment and follow-up                                                                                                                                     | 5                   |
|                                                      | 14b     | Why the trial ended or was stopped                                                                                                                                                          |                     |
| Baseline data                                        | 15      | A table showing baseline demographic and clinical characteristics for each group                                                                                                            | 11                  |
| Numbers analysed                                     | 16      | For each group, number of participants (denominator) included in each analysis and whether the analysis was by original assigned groups                                                     | 10-14, 17           |
| Outcomes and estimation                              | 17a     | For each primary and secondary outcome, results for each group, and the estimated effect size and its precision (such as 95% confidence interval)                                           | 10-14, 18           |
|                                                      | 17b     | For binary outcomes, presentation of both absolute and relative effect sizes is recommended                                                                                                 |                     |
| Ancillary analyses                                   | 18      | Results of any other analyses performed, including subgroup analyses and adjusted analyses, distinguishing pre-specified from exploratory                                                   |                     |
| Harms                                                | 19      | All important harms or unintended effects in each group (for specific guidance see CONSORT for harms [28])                                                                                  | 12-18               |
| <b>Discussion</b>                                    |         |                                                                                                                                                                                             |                     |
| Limitations                                          | 20      | Trial limitations, addressing sources of potential bias, imprecision, and, if relevant, multiplicity of analyses                                                                            | 20                  |
| Generalisability                                     | 21      | Generalisability (external validity, applicability) of the trial findings                                                                                                                   |                     |
| Interpretation                                       | 22      | Interpretation consistent with results, balancing benefits and harms, and considering other relevant evidence                                                                               | 21                  |
| <b>Other information</b>                             |         |                                                                                                                                                                                             |                     |
| Registration                                         | 23      | Registration number and name of trial registry                                                                                                                                              | 9                   |

Table 1. Cont.

| Section/Topic | Item No | Checklist item                                                                  | Reported on page No |
|---------------|---------|---------------------------------------------------------------------------------|---------------------|
| Protocol      | 24      | Where the full trial protocol can be accessed, if available                     | S1_File             |
| Funding       | 25      | Sources of funding and other support (such as supply of drugs), role of funders | 9,22                |

\*We strongly recommend reading this statement in conjunction with the CONSORT 2010 Explanation and Elaboration [13] for important clarifications on all the items. If relevant, we also recommend reading CONSORT extensions for cluster randomised trials [11], non-inferiority and equivalence trials [12], non-pharmacological treatments [32], herbal interventions [33], and pragmatic trials [34]. Additional extensions are forthcoming: for those and for up to date references relevant to this checklist, see <http://www.consort-statement.org>.  
doi:10.1371/journal.pmed.1000251.t001

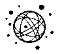

Supplement: pone.0196904.s001.pdf [file pone.0196904.s001.pdf]
