# Supplementary material for: Safety of a silicone elastomer vaginal ring as potential microbicide delivery method in African women: A Phase 1 randomized trial
Source: PubMed Central journal article supplement (PMC5973569; doi:10.1371/journal.pone.0196904), 2018-05-29
Supplement: pone.0196904.s003.pdf [file pone.0196904.s003.pdf]

**S1 Table. Data points for Baseline Demographics.**

| Demographic or Baseline Characteristic  | Site 2 (N=50)<br>n (%) |           | Site 3 (N=50)<br>n (%) |           | Site 4 (N=50)<br>n (%) |           | Site 5 (N=20)<br>n (%) |           | All Sites (N=170)<br>n (%) |           |
|-----------------------------------------|------------------------|-----------|------------------------|-----------|------------------------|-----------|------------------------|-----------|----------------------------|-----------|
|                                         | Group                  |           | Group                  |           | Group                  |           | Group                  |           | Group                      |           |
|                                         | A                      | B         | A                      | B         | A                      | B         | A                      | B         | A                          | B         |
| Race/ethnicity                          |                        |           |                        |           |                        |           |                        |           |                            |           |
| Black                                   | 25(100%)               | 25(100%)  | 27(100%)               | 23(100%)  | 22(81%)                | 19(83%)   | 9(100%)                | 10(91%)   | 83(94%)                    | 77(94%)   |
| Coloured                                | -                      | -         | -                      | -         | -                      | -         | -                      | 1(9%)     | -                          | 1(1%)     |
| Indian                                  | -                      | -         | -                      | -         | 5(19%)                 | 4(17%)    | -                      | -         | 5(6%)                      | 4(5%)     |
| Age*                                    | 29(18-34)              | 29(23-34) | 25(19-34)              | 25(19-35) | 27(20-35)              | 27(22-34) | 23(18-33)              | 26(18-32) | 27(18-35)                  | 27(18-35) |
| Marital status                          |                        |           |                        |           |                        |           |                        |           |                            |           |
| Not married                             | 9(36%)                 | 6(24%)    | 23(85%)                | 18(78%)   | 23(85%)                | 16(70%)   | 9(100%)                | 9(82%)    | 64(73%)                    | 49(60%)   |
| Married                                 | 14(56%)                | 18(72%)   | 3(11%)                 | 3(13%)    | 4(15%)                 | 7(30%)    | -                      | 2(18%)    | 21(24%)                    | 30(37%)   |
| Separated                               | -                      | -         | 1(4%)                  | -         | -                      | -         | -                      | -         | 1(1%)                      | -         |
| Divorced                                | 1(4%)                  | 1(4%)     | -                      | 1(4%)     | -                      | -         | -                      | -         | 1(1%)                      | 2(2%)     |
| Widowed                                 | 1(4%)                  | -         | -                      | 1(4%)     | -                      | -         | -                      | -         | 1(1%)                      | 1(1%)     |
| Has main sex partner                    |                        |           |                        |           |                        |           |                        |           |                            |           |
| Yes                                     | 25(100%)               | 25(100%)  | 27(100%)               | 23(100%)  | 27(100%)               | 23(100%)  | 9(100%)                | 11(100%)  | 88(100%)                   | 82(100%)  |
| Number of sex partners in past 3 months |                        |           |                        |           |                        |           |                        |           |                            |           |
| 1                                       | 25(100%)               | 24(96%)   | 26(96%)                | 23(100%)  | 27(100%)               | 22(96%)   | 8(89%)                 | 11(100%)  | 86(98%)                    | 80(98%)   |
| 2+                                      | -                      | 1(4%)     | 1(4%)                  | -         | -                      | 1(4%)     | 1(11%)                 | -         | 2(2%)                      | 2(2%)     |

\* Median values (and range) are reported for these variables.

\*\* Among those reporting sex in the past 7 days.

| Demographic or Baseline Characteristic               | Site 2 (N=50)<br>n (%) |         | Site 3 (N=50)<br>n (%) |          | Site 4 (N=50)<br>n (%) |         | Site 5 (N=20)<br>n (%) |          | All Sites (N=170)<br>n (%) |         |
|------------------------------------------------------|------------------------|---------|------------------------|----------|------------------------|---------|------------------------|----------|----------------------------|---------|
|                                                      | Group                  |         | Group                  |          | Group                  |         | Group                  |          | Group                      |         |
|                                                      | A                      | B       | A                      | B        | A                      | B       | A                      | B        | A                          | B       |
| Perceived risk of getting HIV compared to others     |                        |         |                        |          |                        |         |                        |          |                            |         |
| High                                                 | 5(20%)                 | 6(24%)  | 2(7%)                  | 4(17%)   | -                      | -       | 2(22%)                 | 1(9%)    | 9(10%)                     | 11(14%) |
| About the same                                       | 6(24%)                 | 5(20%)  | 3(11%)                 | 4(17%)   | 1(4%)                  | 2(9%)   | 3(33%)                 | -        | 13(15%)                    | 11(14%) |
| Low                                                  | 14(56%)                | 14(56%) | 22(81%)                | 15(65%)  | 25(96%)                | 20(91%) | 4(44%)                 | 10(91%)  | 65(75%)                    | 59(73%) |
| Has ever used male condom                            |                        |         |                        |          |                        |         |                        |          |                            |         |
| Yes                                                  | 14(56%)                | 11(44%) | 26(96%)                | 23(100%) | 24(89%)                | 21(91%) | 9(100%)                | 11(100%) | 73(83%)                    | 66(80%) |
| No                                                   | 11(44%)                | 14(56%) | 1(4%)                  | -        | 3(11%)                 | 2(9%)   | -                      | -        | 15(17%)                    | 16(20%) |
| Number of sex acts with main partner in past 7 days* |                        |         |                        |          |                        |         |                        |          |                            |         |
|                                                      | 1(0-3)                 | 1(0-4)  | 3(0-7)                 | 2(0-14)  | 2(0-8)                 | 2(0-6)  | 2(0-4)                 | 2(0-4)   | 2(0-8)                     | 1(0-14) |
| Condom use in past 7 days with main partner**        | <b>(N=37)</b>          |         | <b>(N=41)</b>          |          | <b>(N=45)</b>          |         | <b>(N=18)</b>          |          | <b>(N=141)</b>             |         |
| None                                                 | 12(75%)                | 18(86%) | 3(14%)                 | -        | 6(25%)                 | 1(5%)   | 1(13%)                 | -        | 22(31%)                    | 19(27%) |
| Some                                                 | -                      | -       | -                      | 1(5%)    | 3(13%)                 | 3(14%)  | 1(13%)                 | -        | 4(6%)                      | 4(6%)   |
| Every time had sex                                   | 4(25%)                 | 3(14%)  | 19(86%)                | 18(95%)  | 15(63%)                | 17(81%) | 6(75%)                 | 10(100%) | 44(63%)                    | 48(68%) |

\* Median values (and range) are reported for these variables.

\*\* Among those reporting sex in the past 7 days.
