# Supplementary material for: Safety of a silicone elastomer vaginal ring as potential microbicide delivery method in African women: A Phase 1 randomized trial
Source: PubMed Central journal article supplement (PMC5973569; doi:10.1371/journal.pone.0196904), 2018-05-29
Supplement: pone.0196904.s005.pdf [file pone.0196904.s005.pdf]

S3 Table. Summary Table for Adverse Event Occurrence Rates by Research Center and per Treatment Phase

| MedDRA Preferred Term              | Reported Severity (DAIDS Grade) | Center 02                    |                        | Center 03                    |                        |
|------------------------------------|---------------------------------|------------------------------|------------------------|------------------------------|------------------------|
|                                    |                                 | Ring Intervention Phase N=48 | Observation Phase N=49 | Ring Intervention Phase N=48 | Observation Phase N=49 |
| Participant with Any Adverse Event |                                 | 28 (58.3%)                   | 27 (55.1%)             | 35 (72.9%)                   | 40 (81.6%)             |
| ABDOMINAL MASS                     | Grade 1                         | 0 (0.0%)                     | 0 (0.0%)               | 1 (2.1%)                     | 0 (0.0%)               |
| ABDOMINAL PAIN                     | Grade 1,2,3                     | 0 (0.0%)                     | 0 (0.0%)               | 0 (0.0%)                     | 3 (6.1%)               |
| ABDOMINAL PAIN LOWER               | Grade 1,2                       | 2 (4.2%)                     | 2 (4.1%)               | 1 (2.1%)                     | 1 (2.0%)               |
| ABDOMINAL PAIN UPPER               | Grade 2                         | 0 (0.0%)                     | 0 (0.0%)               | 0 (0.0%)                     | 0 (0.0%)               |
| ABDOMINAL TENDERNESS               | Grade 1                         | 0 (0.0%)                     | 0 (0.0%)               | 0 (0.0%)                     | 0 (0.0%)               |
| ABSCESS LIMB                       | Grade 2                         | 0 (0.0%)                     | 0 (0.0%)               | 2 (4.2%)                     | 0 (0.0%)               |
| ADNEXA UTERI PAIN                  | Grade 1                         | 0 (0.0%)                     | 0 (0.0%)               | 1 (2.1%)                     | 1 (2.0%)               |
| ANXIETY                            | Grade 2                         | 0 (0.0%)                     | 0 (0.0%)               | 1 (2.1%)                     | 0 (0.0%)               |
| APPENDICITIS                       | Grade 3                         | 1 (2.1%)                     | 0 (0.0%)               | 0 (0.0%)                     | 0 (0.0%)               |
| ARTHRALGIA                         | Grade 2                         | 0 (0.0%)                     | 1 (2.0%)               | 0 (0.0%)                     | 0 (0.0%)               |
| ASCARIASIS                         | Grade 2                         | 0 (0.0%)                     | 1 (2.0%)               | 0 (0.0%)                     | 0 (0.0%)               |
| ASTHMA                             | Grade 1                         | 0 (0.0%)                     | 0 (0.0%)               | 0 (0.0%)                     | 0 (0.0%)               |
| BACK PAIN                          | Grade 1                         | 0 (0.0%)                     | 0 (0.0%)               | 1 (2.1%)                     | 0 (0.0%)               |
| BREAST PAIN                        | Grade 1                         | 0 (0.0%)                     | 0 (0.0%)               | 1 (2.1%)                     | 0 (0.0%)               |
| BRONCHIAL HYPERREACTIVITY          | Grade 1                         | 0 (0.0%)                     | 0 (0.0%)               | 0 (0.0%)                     | 1 (2.0%)               |
| BRONCHITIS                         | Grade 2                         | 5 (10.4%)                    | 4 (8.2%)               | 0 (0.0%)                     | 0 (0.0%)               |
| CERVICAL DISCHARGE                 | Grade 1                         | 0 (0.0%)                     | 0 (0.0%)               | 0 (0.0%)                     | 0 (0.0%)               |
| CERVICITIS                         | Grade 1,2                       | 0 (0.0%)                     | 0 (0.0%)               | 0 (0.0%)                     | 0 (0.0%)               |
| CERVIX ERYTHEMA                    | Grade 1                         | 0 (0.0%)                     | 0 (0.0%)               | 0 (0.0%)                     | 0 (0.0%)               |
| CERVIX HAEMORRHAGE UTERINE         | Grade 1                         | 0 (0.0%)                     | 0 (0.0%)               | 1 (2.1%)                     | 0 (0.0%)               |
| CHEST PAIN                         | Grade 1                         | 0 (0.0%)                     | 0 (0.0%)               | 0 (0.0%)                     | 1 (2.0%)               |

Centre 02: Moshi, Tanzania; Centre 03: Johannesburg, South Africa; Centre 04: Durban, South Africa  
 Centre 05: DTHF, Cape Town, South Africa

| MedDRA Preferred Term  | Centre 02                       |                         |                   |                         | Center 02         |  |
|------------------------|---------------------------------|-------------------------|-------------------|-------------------------|-------------------|--|
|                        | Reported Severity (DAIDS Grade) | Ring Intervention Phase | Observation Phase | Ring Intervention Phase | Observation Phase |  |
|                        |                                 | N=48                    | N=49              | N=48                    | N=49              |  |
| COITAL BLEEDING        | Grade 1                         | 0 (0.0%)                | 0 (0.0%)          | 1 (2.1%)                | 0 (0.0%)          |  |
| CONSTIPATION           | Grade 1                         | 0 (0.0%)                | 0 (0.0%)          | 0 (0.0%)                | 1 (2.0%)          |  |
| CONTUSION              | Grade 2                         | 0 (0.0%)                | 0 (0.0%)          | 1 (2.1%)                | 0 (0.0%)          |  |
| CONVERSION DISORDER    | Grade 2                         | 0 (0.0%)                | 0 (0.0%)          | 0 (0.0%)                | 0 (0.0%)          |  |
| COUGH                  | Grade 1,2                       | 2 (4.2%)                | 0 (0.0%)          | 1 (2.1%)                | 0 (0.0%)          |  |
| CYSTITIS               | Grade 1,2,3                     | 0 (0.0%)                | 0 (0.0%)          | 2 (4.2%)                | 2 (4.1%)          |  |
| DEAFNESS UNILATERAL    | Grade 2                         | 0 (0.0%)                | 0 (0.0%)          | 1 (2.1%)                | 0 (0.0%)          |  |
| DEPRESSION             | Grade 2                         | 0 (0.0%)                | 0 (0.0%)          | 1 (2.1%)                | 0 (0.0%)          |  |
| DERMATITIS ALLERGIC    | Grade 1,2                       | 0 (0.0%)                | 0 (0.0%)          | 1 (2.1%)                | 1 (2.0%)          |  |
| DIARRHOEA              | Grade 1,2                       | 3 (6.3%)                | 1 (2.0%)          | 0 (0.0%)                | 1 (2.0%)          |  |
| DIZZINESS              | Grade 1                         | 1 (2.1%)                | 0 (0.0%)          | 2 (4.2%)                | 1 (2.0%)          |  |
| DYSENTERY              | Grade 2                         | 1 (2.1%)                | 0 (0.0%)          | 0 (0.0%)                | 0 (0.0%)          |  |
| DYSMENORRHOEA          | Grade 1,2                       | 0 (0.0%)                | 0 (0.0%)          | 5 (10.4%)               | 5 (10.2%)         |  |
| DYSPAREUNIA            | Grade 1                         | 0 (0.0%)                | 0 (0.0%)          | 1 (2.1%)                | 0 (0.0%)          |  |
| DYSURIA                | Grade 1                         | 0 (0.0%)                | 0 (0.0%)          | 0 (0.0%)                | 0 (0.0%)          |  |
| EAR PAIN               | Grade 1                         | 0 (0.0%)                | 0 (0.0%)          | 0 (0.0%)                | 1 (2.0%)          |  |
| EAR PRURITUS           | Grade 2                         | 0 (0.0%)                | 0 (0.0%)          | 0 (0.0%)                | 0 (0.0%)          |  |
| ECZEMA                 | Grade 1,2                       | 0 (0.0%)                | 0 (0.0%)          | 1 (2.1%)                | 0 (0.0%)          |  |
| EPISTAXIS              | Grade 1                         | 0 (0.0%)                | 0 (0.0%)          | 2 (4.2%)                | 0 (0.0%)          |  |
| FATIGUE                | Grade 1,2                       | 1 (2.1%)                | 0 (0.0%)          | 0 (0.0%)                | 1 (2.0%)          |  |
| FIBROADENOMA OF BREAST | Grade 1                         | 0 (0.0%)                | 0 (0.0%)          | 1 (2.1%)                | 0 (0.0%)          |  |
| FOLLICULITIS           | Grade 1                         | 0 (0.0%)                | 0 (0.0%)          | 1 (2.1%)                | 2 (4.1%)          |  |
| FOOT FRACTURE          | Grade 2                         | 0 (0.0%)                | 0 (0.0%)          | 0 (0.0%)                | 0 (0.0%)          |  |

Centre 02: Moshi, Tanzania; Centre 03: Johannesburg, South Africa; Centre 04: Durban, South Africa  
Centre 05: DTHF, Cape Town, South Africa

| MedDRA Preferred Term              | Reported Severity<br>(DAIDS Grade) | Center 02                       |                           | Center 03                       |                           |
|------------------------------------|------------------------------------|---------------------------------|---------------------------|---------------------------------|---------------------------|
|                                    |                                    | Ring Intervention Phase<br>N=48 | Observation Phase<br>N=49 | Ring Intervention Phase<br>N=48 | Observation Phase<br>N=49 |
|                                    |                                    | GASTRITIS                       | Grade 1,2                 | 0 (0.0%)                        | 1 (2.0%)                  |
| GASTROENTERITIS                    | Grade 2                            | 0 (0.0%)                        | 0 (0.0%)                  | 1 (2.1%)                        | 0 (0.0%)                  |
| GASTROENTERITIS SHIGELLA           | Grade 2                            | 0 (0.0%)                        | 2 (4.1%)                  | 0 (0.0%)                        | 0 (0.0%)                  |
| GENITAL BURNING SENSATION          | Grade 1                            | 0 (0.0%)                        | 0 (0.0%)                  | 1 (2.1%)                        | 0 (0.0%)                  |
| GENITAL DISCOMFORT                 | Grade 1                            | 0 (0.0%)                        | 0 (0.0%)                  | 1 (2.1%)                        | 0 (0.0%)                  |
| GENITAL EROSION                    | Grade 1                            | 0 (0.0%)                        | 0 (0.0%)                  | 2 (4.2%)                        | 1 (2.0%)                  |
| GENITAL ERYTHEMA                   | Grade 1                            | 0 (0.0%)                        | 0 (0.0%)                  | 1 (2.1%)                        | 0 (0.0%)                  |
| GENITAL HERPES                     | Grade 1,2                          | 0 (0.0%)                        | 0 (0.0%)                  | 2 (4.2%)                        | 3 (6.1%)                  |
| GENITAL PAIN                       | Grade 1                            | 0 (0.0%)                        | 0 (0.0%)                  | 1 (2.1%)                        | 0 (0.0%)                  |
| GINGIVAL ULCERATION                | Grade 1                            | 0 (0.0%)                        | 0 (0.0%)                  | 1 (2.1%)                        | 0 (0.0%)                  |
| GONORRHOEA                         | Grade 1,2                          | 1 (2.1%)                        | 0 (0.0%)                  | 1 (2.1%)                        | 2 (4.1%)                  |
| GYNAECOLOGICAL CHLAMYDIA INFECTION | Grade 1,2                          | 0 (0.0%)                        | 1 (2.0%)                  | 4 (8.3%)                        | 5 (10.2%)                 |
| HAEMORRHOIDS                       | Grade 1,2                          | 0 (0.0%)                        | 0 (0.0%)                  | 1 (2.1%)                        | 1 (2.0%)                  |
| HEAD INJURY                        | Grade 2                            | 0 (0.0%)                        | 0 (0.0%)                  | 0 (0.0%)                        | 1 (2.0%)                  |
| HEADACHE                           | Grade 1,2                          | 4 (8.3%)                        | 1 (2.0%)                  | 6 (12.5%)                       | 9 (18.4%)                 |
| HEAT RASH                          | Grade 2                            | 0 (0.0%)                        | 0 (0.0%)                  | 0 (0.0%)                        | 0 (0.0%)                  |
| INFLUENZA LIKE ILLNESS             | Grade 1,2                          | 3 (6.3%)                        | 3 (6.1%)                  | 8 (16.7%)                       | 11 (22.4%)                |
| INJURY                             | Grade 2                            | 0 (0.0%)                        | 0 (0.0%)                  | 1 (2.1%)                        | 0 (0.0%)                  |
| JOINT SPRAIN                       | Grade 2                            | 0 (0.0%)                        | 1 (2.0%)                  | 1 (2.1%)                        | 0 (0.0%)                  |
| LACERATION                         | Grade 1                            | 0 (0.0%)                        | 0 (0.0%)                  | 0 (0.0%)                        | 1 (2.0%)                  |
| LARYNGITIS                         | Grade 2                            | 4 (8.3%)                        | 3 (6.1%)                  | 0 (0.0%)                        | 0 (0.0%)                  |
| LARYNGOTRACHEITIS                  | Grade 2                            | 1 (2.1%)                        | 0 (0.0%)                  | 0 (0.0%)                        | 0 (0.0%)                  |
| LOWER RESPIRATORY TRACT INFECTION  | Grade 2                            | 0 (0.0%)                        | 0 (0.0%)                  | 1 (2.1%)                        | 0 (0.0%)                  |

Centre 02: Moshi, Tanzania; Centre 03: Johannesburg, South Africa; Centre 04: Durban, South Africa  
Centre 05: DTHF, Cape Town, South Africa

| MedDRA Preferred Term  | Reported Severity<br>(DAIDS Grade) | Center 02                       |                           | Center 03                       |                           |
|------------------------|------------------------------------|---------------------------------|---------------------------|---------------------------------|---------------------------|
|                        |                                    | Ring Intervention Phase<br>N=48 | Observation Phase<br>N=49 | Ring Intervention Phase<br>N=48 | Observation Phase<br>N=49 |
|                        |                                    | LYMPHADENOPATHY                 | Grade 1                   | 0 (0.0%)                        | 0 (0.0%)                  |
| MALAISE                | Grade 1                            | 2 (4.2%)                        | 0 (0.0%)                  | 0 (0.0%)                        | 0 (0.0%)                  |
| MALARIA                | Grade 2                            | 4 (8.3%)                        | 2 (4.1%)                  | 0 (0.0%)                        | 0 (0.0%)                  |
| MENORRHAGIA            | Grade 1,2                          | 1 (2.1%)                        | 1 (2.0%)                  | 1 (2.1%)                        | 2 (4.1%)                  |
| METRORRHAGIA           | Grade 1,2                          | 3 (6.3%)                        | 5 (10.2%)                 | 3 (6.3%)                        | 3 (6.1%)                  |
| MOUTH ULCERATION       | Grade 2                            | 0 (0.0%)                        | 0 (0.0%)                  | 0 (0.0%)                        | 0 (0.0%)                  |
| MUSCLE STRAIN          | Grade 1                            | 0 (0.0%)                        | 0 (0.0%)                  | 1 (2.1%)                        | 1 (2.0%)                  |
| NAIL TINEA             | Grade 2                            | 0 (0.0%)                        | 0 (0.0%)                  | 0 (0.0%)                        | 0 (0.0%)                  |
| NASOPHARYNGITIS        | Grade 1                            | 0 (0.0%)                        | 0 (0.0%)                  | 0 (0.0%)                        | 1 (2.0%)                  |
| NAUSEA                 | Grade 1                            | 0 (0.0%)                        | 1 (2.0%)                  | 0 (0.0%)                        | 1 (2.0%)                  |
| NECK PAIN              | Grade 2                            | 2 (4.2%)                        | 0 (0.0%)                  | 0 (0.0%)                        | 0 (0.0%)                  |
| PAIN                   | Grade 1                            | 0 (0.0%)                        | 0 (0.0%)                  | 0 (0.0%)                        | 0 (0.0%)                  |
| PALPITATIONS           | Grade 1                            | 1 (2.1%)                        | 0 (0.0%)                  | 0 (0.0%)                        | 0 (0.0%)                  |
| PEPTIC ULCER           | Grade 2                            | 0 (0.0%)                        | 0 (0.0%)                  | 0 (0.0%)                        | 0 (0.0%)                  |
| PERIORBITAL ABSCESS    | Grade 1                            | 0 (0.0%)                        | 0 (0.0%)                  | 0 (0.0%)                        | 0 (0.0%)                  |
| PHARYNGITIS            | Grade 1                            | 0 (0.0%)                        | 0 (0.0%)                  | 1 (2.1%)                        | 1 (2.0%)                  |
| PHARYNGOLARYNGEAL PAIN | Grade 1                            | 0 (0.0%)                        | 0 (0.0%)                  | 0 (0.0%)                        | 1 (2.0%)                  |
| PRURITUS GENITAL       | Grade 1                            | 2 (4.2%)                        | 0 (0.0%)                  | 1 (2.1%)                        | 0 (0.0%)                  |
| PYREXIA                | Grade 1                            | 0 (0.0%)                        | 1 (2.0%)                  | 0 (0.0%)                        | 0 (0.0%)                  |
| RASH                   | Grade 2                            | 0 (0.0%)                        | 1 (2.0%)                  | 0 (0.0%)                        | 0 (0.0%)                  |
| RASH GENERALISED       | Grade 1                            | 0 (0.0%)                        | 0 (0.0%)                  | 0 (0.0%)                        | 0 (0.0%)                  |
| RASH PRURITIC          | Grade 2                            | 2 (4.2%)                        | 0 (0.0%)                  | 0 (0.0%)                        | 0 (0.0%)                  |
| RASH PUSTULAR          | Grade 1                            | 0 (0.0%)                        | 0 (0.0%)                  | 0 (0.0%)                        | 0 (0.0%)                  |

Centre 02: Moshi, Tanzania; Centre 03: Johannesburg, South Africa; Centre 04: Durban, South Africa  
Centre 05: DTHF, Cape Town, South Africa

| MedDRA Preferred Term             | Center 02                       |                         |                   |                         | Center 03         |  |
|-----------------------------------|---------------------------------|-------------------------|-------------------|-------------------------|-------------------|--|
|                                   | Reported Severity (DAIDS Grade) | Ring Intervention Phase | Observation Phase | Ring Intervention Phase | Observation Phase |  |
|                                   |                                 | N=48                    | N=49              | N=48                    | N=49              |  |
| RASH VESICULAR                    | Grade 1                         | 0 (0.0%)                | 0 (0.0%)          | 0 (0.0%)                | 1 (2.0%)          |  |
| SINUS HEADACHE                    | Grade 1                         | 0 (0.0%)                | 0 (0.0%)          | 0 (0.0%)                | 1 (2.0%)          |  |
| SINUSITIS                         | Grade 1,2                       | 1 (2.1%)                | 1 (2.0%)          | 2 (4.2%)                | 1 (2.0%)          |  |
| SKIN LACERATION                   | Grade 2                         | 1 (2.1%)                | 0 (0.0%)          | 0 (0.0%)                | 0 (0.0%)          |  |
| SOFT TISSUE INFECTION             | Grade 1                         | 0 (0.0%)                | 0 (0.0%)          | 0 (0.0%)                | 0 (0.0%)          |  |
| SOFT TISSUE INJURY                | Grade 1                         | 0 (0.0%)                | 0 (0.0%)          | 0 (0.0%)                | 0 (0.0%)          |  |
| STRESS                            | Grade 2                         | 0 (0.0%)                | 0 (0.0%)          | 1 (2.1%)                | 0 (0.0%)          |  |
| SUBCUTANEOUS ABSCESS              | Grade 2                         | 0 (0.0%)                | 0 (0.0%)          | 0 (0.0%)                | 1 (2.0%)          |  |
| TINEA INFECTION                   | Grade 2                         | 0 (0.0%)                | 0 (0.0%)          | 0 (0.0%)                | 0 (0.0%)          |  |
| TONSILLITIS                       | Grade 2                         | 3 (6.3%)                | 2 (4.1%)          | 2 (4.2%)                | 0 (0.0%)          |  |
| TOOTH INJURY                      | Grade 2                         | 0 (0.0%)                | 0 (0.0%)          | 1 (2.1%)                | 0 (0.0%)          |  |
| TOOTHACHE                         | Grade 1,2                       | 0 (0.0%)                | 0 (0.0%)          | 2 (4.2%)                | 0 (0.0%)          |  |
| UPPER RESPIRATORY TRACT INFECTION | Grade 1,2                       | 0 (0.0%)                | 2 (4.1%)          | 0 (0.0%)                | 2 (4.1%)          |  |
| URINARY TRACT INFECTION           | Grade 1,2                       | 3 (6.3%)                | 0 (0.0%)          | 1 (2.1%)                | 0 (0.0%)          |  |
| UTERINE PAIN                      | Grade 1                         | 0 (0.0%)                | 0 (0.0%)          | 1 (2.1%)                | 1 (2.0%)          |  |
| UTERINE SPASM                     | Grade 1,2                       | 0 (0.0%)                | 0 (0.0%)          | 0 (0.0%)                | 2 (4.1%)          |  |
| VAGINAL CANDIDIASIS               | Grade 1,2                       | 0 (0.0%)                | 2 (4.1%)          | 6 (12.5%)               | 3 (6.1%)          |  |
| VAGINAL DISCHARGE                 | Grade 1                         | 1 (2.1%)                | 0 (0.0%)          | 2 (4.2%)                | 0 (0.0%)          |  |
| VAGINAL ERYTHEMA                  | Grade 1                         | 0 (0.0%)                | 0 (0.0%)          | 0 (0.0%)                | 1 (2.0%)          |  |
| VAGINAL INFECTION                 | Grade 2                         | 0 (0.0%)                | 0 (0.0%)          | 0 (0.0%)                | 0 (0.0%)          |  |
| VAGINAL LACERATION                | Grade 2                         | 0 (0.0%)                | 0 (0.0%)          | 0 (0.0%)                | 0 (0.0%)          |  |
| VAGINAL ODOUR                     | Grade 1                         | 0 (0.0%)                | 0 (0.0%)          | 3 (6.3%)                | 1 (2.0%)          |  |
| VAGINAL PAIN                      | Grade 1                         | 0 (0.0%)                | 0 (0.0%)          | 0 (0.0%)                | 0 (0.0%)          |  |

Centre 02: Moshi, Tanzania; Centre 03: Johannesburg, South Africa; Centre 04: Durban, South Africa  
Centre 05: DTHF, Cape Town, South Africa

| MedDRA Preferred Term      | Reported Severity (DAIDS Grade) | Center 02                    |                        | Center 03                    |                        |
|----------------------------|---------------------------------|------------------------------|------------------------|------------------------------|------------------------|
|                            |                                 | Ring Intervention Phase N=48 | Observation Phase N=49 | Ring Intervention Phase N=48 | Observation Phase N=49 |
| VAGINITIS BACTERIAL        | Grade 1,2                       | 0 (0.0%)                     | 0 (0.0%)               | 7 (14.6%)                    | 6 (12.2%)              |
| VIRAL RHINITIS             | Grade 1                         | 0 (0.0%)                     | 0 (0.0%)               | 0 (0.0%)                     | 1 (2.0%)               |
| VULVAL ERYTHEMA            | Grade 1                         | 1 (2.1%)                     | 0 (0.0%)               | 0 (0.0%)                     | 0 (0.0%)               |
| VULVAR EROSION             | Grade 1                         | 0 (0.0%)                     | 1 (2.0%)               | 0 (0.0%)                     | 0 (0.0%)               |
| VULVOVAGINAL DISCOMFORT    | Grade 1                         | 0 (0.0%)                     | 0 (0.0%)               | 0 (0.0%)                     | 0 (0.0%)               |
| VULVOVAGINAL DRYNESS       | Grade 1                         | 0 (0.0%)                     | 0 (0.0%)               | 0 (0.0%)                     | 1 (2.0%)               |
| VULVOVAGINAL PRURITUS      | Grade 1                         | 0 (0.0%)                     | 0 (0.0%)               | 1 (2.1%)                     | 2 (4.1%)               |
| VULVOVAGINITIS TRICHOMONAL | Grade 1,2                       | 0 (0.0%)                     | 1 (2.0%)               | 0 (0.0%)                     | 0 (0.0%)               |

Centre 02: Moshi, Tanzania; Centre 03: Johannesburg, South Africa; Centre 04: Durban, South Africa  
Centre 05: DTHF, Cape Town, South Africa

| MedDRA Preferred Term              | Reported Severity (DAIDS Grade) | Center 02                    |                        | Center 03                    |                        |
|------------------------------------|---------------------------------|------------------------------|------------------------|------------------------------|------------------------|
|                                    |                                 | Ring Intervention Phase N=45 | Observation Phase N=45 | Ring Intervention Phase N=17 | Observation Phase N=18 |
| Participant with Any Adverse Event |                                 | 24 (53.3%)                   | 27 (60.0%)             | 13 (76.5%)                   | 13 (72.2%)             |
| ABDOMINAL MASS                     | Grade 1                         | 0 (0.0%)                     | 0 (0.0%)               | 0 (0.0%)                     | 0 (0.0%)               |
| ABDOMINAL PAIN                     | Grade 1,2,3                     | 1 (2.2%)                     | 0 (0.0%)               | 0 (0.0%)                     | 0 (0.0%)               |
| ABDOMINAL PAIN LOWER               | Grade 1,2                       | 1 (2.2%)                     | 0 (0.0%)               | 1 (5.9%)                     | 0 (0.0%)               |
| ABDOMINAL PAIN UPPER               | Grade 2                         | 0 (0.0%)                     | 0 (0.0%)               | 0 (0.0%)                     | 0 (0.0%)               |
| ABDOMINAL TENDERNESS               | Grade 1                         | 0 (0.0%)                     | 0 (0.0%)               | 1 (5.9%)                     | 0 (0.0%)               |
| ABSCESS LIMB                       | Grade 2                         | 0 (0.0%)                     | 0 (0.0%)               | 0 (0.0%)                     | 0 (0.0%)               |
| ADNEXA UTERI PAIN                  | Grade 1                         | 0 (0.0%)                     | 0 (0.0%)               | 0 (0.0%)                     | 0 (0.0%)               |
| ANXIETY                            | Grade 2                         | 0 (0.0%)                     | 0 (0.0%)               | 0 (0.0%)                     | 0 (0.0%)               |
| APPENDICITIS                       | Grade 3                         | 0 (0.0%)                     | 0 (0.0%)               | 0 (0.0%)                     | 0 (0.0%)               |
| ARTHRALGIA                         | Grade 2                         | 0 (0.0%)                     | 0 (0.0%)               | 0 (0.0%)                     | 0 (0.0%)               |
| ASCARIASIS                         | Grade 2                         | 0 (0.0%)                     | 0 (0.0%)               | 0 (0.0%)                     | 0 (0.0%)               |
| ASTHMA                             | Grade 1                         | 1 (2.2%)                     | 1 (2.2%)               | 0 (0.0%)                     | 0 (0.0%)               |
| BACK PAIN                          | Grade 1                         | 1 (2.2%)                     | 1 (2.2%)               | 0 (0.0%)                     | 0 (0.0%)               |
| BREAST PAIN                        | Grade 1                         | 0 (0.0%)                     | 0 (0.0%)               | 0 (0.0%)                     | 0 (0.0%)               |
| BRONCHIAL HYPERREACTIVITY          | Grade 1                         | 0 (0.0%)                     | 0 (0.0%)               | 0 (0.0%)                     | 0 (0.0%)               |
| BRONCHITIS                         | Grade 2                         | 0 (0.0%)                     | 0 (0.0%)               | 0 (0.0%)                     | 0 (0.0%)               |
| CERVICAL DISCHARGE                 | Grade 1                         | 0 (0.0%)                     | 0 (0.0%)               | 1 (5.9%)                     | 0 (0.0%)               |
| CERVICITIS                         | Grade 1,2                       | 0 (0.0%)                     | 0 (0.0%)               | 0 (0.0%)                     | 1 (5.6%)               |
| CERVIX ERYTHEMA                    | Grade 1                         | 0 (0.0%)                     | 0 (0.0%)               | 2 (11.8%)                    | 1 (5.6%)               |
| CERVIX HAEMORRHAGE UTERINE         | Grade 1                         | 0 (0.0%)                     | 0 (0.0%)               | 0 (0.0%)                     | 0 (0.0%)               |
| CHEST PAIN                         | Grade 1                         | 0 (0.0%)                     | 0 (0.0%)               | 0 (0.0%)                     | 0 (0.0%)               |

Centre 02: Moshi, Tanzania; Centre 03: Johannesburg, South Africa; Centre 04: Durban, South Africa  
Centre 05: DTHF, Cape Town, South Africa

| MedDRA Preferred Term  | Center 02                          |                               |               |                               | Center 03     |  |
|------------------------|------------------------------------|-------------------------------|---------------|-------------------------------|---------------|--|
|                        | Reported Severity<br>(DAIDS Grade) | Ring                          | Observation   | Ring                          | Observation   |  |
|                        |                                    | Intervention<br>Phase<br>N=45 | Phase<br>N=45 | Intervention<br>Phase<br>N=17 | Phase<br>N=18 |  |
| COITAL BLEEDING        | Grade 1                            | 0 (0.0%)                      | 0 (0.0%)      | 0 (0.0%)                      | 0 (0.0%)      |  |
| CONSTIPATION           | Grade 1                            | 0 (0.0%)                      | 0 (0.0%)      | 0 (0.0%)                      | 0 (0.0%)      |  |
| CONTUSION              | Grade 2                            | 0 (0.0%)                      | 0 (0.0%)      | 0 (0.0%)                      | 0 (0.0%)      |  |
| CONVERSION DISORDER    | Grade 2                            | 0 (0.0%)                      | 0 (0.0%)      | 0 (0.0%)                      | 0 (0.0%)      |  |
| COUGH                  | Grade 1,2                          | 1 (2.2%)                      | 0 (0.0%)      | 0 (0.0%)                      | 0 (0.0%)      |  |
| CYSTITIS               | Grade 1,2,3                        | 0 (0.0%)                      | 0 (0.0%)      | 0 (0.0%)                      | 0 (0.0%)      |  |
| DEAFNESS UNILATERAL    | Grade 2                            | 0 (0.0%)                      | 0 (0.0%)      | 0 (0.0%)                      | 0 (0.0%)      |  |
| DEPRESSION             | Grade 2                            | 0 (0.0%)                      | 0 (0.0%)      | 0 (0.0%)                      | 0 (0.0%)      |  |
| DERMATITIS ALLERGIC    | Grade 1,2                          | 0 (0.0%)                      | 0 (0.0%)      | 0 (0.0%)                      | 0 (0.0%)      |  |
| DIARRHOEA              | Grade 1,2                          | 1 (2.2%)                      | 0 (0.0%)      | 0 (0.0%)                      | 0 (0.0%)      |  |
| DIZZINESS              | Grade 1                            | 0 (0.0%)                      | 0 (0.0%)      | 0 (0.0%)                      | 0 (0.0%)      |  |
| DYSENTERY              | Grade 2                            | 0 (0.0%)                      | 0 (0.0%)      | 0 (0.0%)                      | 0 (0.0%)      |  |
| DYSMENORRHOEA          | Grade 1,2                          | 0 (0.0%)                      | 0 (0.0%)      | 0 (0.0%)                      | 0 (0.0%)      |  |
| DYSPAREUNIA            | Grade 1                            | 0 (0.0%)                      | 1 (2.2%)      | 0 (0.0%)                      | 0 (0.0%)      |  |
| DYSURIA                | Grade 1                            | 1 (2.2%)                      | 0 (0.0%)      | 0 (0.0%)                      | 0 (0.0%)      |  |
| EAR PAIN               | Grade 1                            | 0 (0.0%)                      | 0 (0.0%)      | 0 (0.0%)                      | 0 (0.0%)      |  |
| EAR PRURITUS           | Grade 2                            | 0 (0.0%)                      | 0 (0.0%)      | 1 (5.9%)                      | 0 (0.0%)      |  |
| ECZEMA                 | Grade 1,2                          | 0 (0.0%)                      | 1 (2.2%)      | 0 (0.0%)                      | 0 (0.0%)      |  |
| EPISTAXIS              | Grade 1                            | 0 (0.0%)                      | 0 (0.0%)      | 0 (0.0%)                      | 0 (0.0%)      |  |
| FATIGUE                | Grade 1,2                          | 0 (0.0%)                      | 0 (0.0%)      | 0 (0.0%)                      | 0 (0.0%)      |  |
| FIBROADENOMA OF BREAST | Grade 1                            | 0 (0.0%)                      | 0 (0.0%)      | 0 (0.0%)                      | 0 (0.0%)      |  |
| FOLLICULITIS           | Grade 1                            | 0 (0.0%)                      | 0 (0.0%)      | 0 (0.0%)                      | 1 (5.6%)      |  |
| FOOT FRACTURE          | Grade 2                            | 0 (0.0%)                      | 0 (0.0%)      | 0 (0.0%)                      | 0 (0.0%)      |  |

Centre 02: Moshi, Tanzania; Centre 03: Johannesburg, South Africa; Centre 04: Durban, South Africa  
Centre 05: DTHF, Cape Town, South Africa



| MedDRA Preferred Term              | Center 02                          |                               |               |                               | Center 03     |  |
|------------------------------------|------------------------------------|-------------------------------|---------------|-------------------------------|---------------|--|
|                                    | Reported Severity<br>(DAIDS Grade) | Ring                          | Observation   | Ring                          | Observation   |  |
|                                    |                                    | Intervention<br>Phase<br>N=45 | Phase<br>N=45 | Intervention<br>Phase<br>N=17 | Phase<br>N=18 |  |
| GASTRITIS                          | Grade 1,2                          | 0 (0.0%)                      | 0 (0.0%)      | 1 (5.9%)                      | 0 (0.0%)      |  |
| GASTROENTERITIS                    | Grade 2                            | 0 (0.0%)                      | 0 (0.0%)      | 0 (0.0%)                      | 0 (0.0%)      |  |
| GASTROENTERITIS SHIGELLA           | Grade 2                            | 0 (0.0%)                      | 0 (0.0%)      | 0 (0.0%)                      | 0 (0.0%)      |  |
| GENITAL BURNING SENSATION          | Grade 1                            | 0 (0.0%)                      | 0 (0.0%)      | 0 (0.0%)                      | 0 (0.0%)      |  |
| GENITAL DISCOMFORT                 | Grade 1                            | 0 (0.0%)                      | 0 (0.0%)      | 0 (0.0%)                      | 0 (0.0%)      |  |
| GENITAL EROSION                    | Grade 1                            | 0 (0.0%)                      | 0 (0.0%)      | 0 (0.0%)                      | 0 (0.0%)      |  |
| GENITAL ERYTHEMA                   | Grade 1                            | 0 (0.0%)                      | 0 (0.0%)      | 0 (0.0%)                      | 0 (0.0%)      |  |
| GENITAL HERPES                     | Grade 1,2                          | 0 (0.0%)                      | 0 (0.0%)      | 0 (0.0%)                      | 0 (0.0%)      |  |
| GENITAL PAIN                       | Grade 1                            | 0 (0.0%)                      | 0 (0.0%)      | 0 (0.0%)                      | 0 (0.0%)      |  |
| GINGIVAL ULCERATION                | Grade 1                            | 0 (0.0%)                      | 0 (0.0%)      | 0 (0.0%)                      | 0 (0.0%)      |  |
| GONORRHOEA                         | Grade 1,2                          | 1 (2.2%)                      | 1 (2.2%)      | 0 (0.0%)                      | 0 (0.0%)      |  |
| GYNAECOLOGICAL CHLAMYDIA INFECTION | Grade 1,2                          | 2 (4.4%)                      | 1 (2.2%)      | 0 (0.0%)                      | 2 (11.1%)     |  |
| HAEMORRHOIDS                       | Grade 1,2                          | 0 (0.0%)                      | 0 (0.0%)      | 0 (0.0%)                      | 0 (0.0%)      |  |
| HEAD INJURY                        | Grade 2                            | 0 (0.0%)                      | 0 (0.0%)      | 0 (0.0%)                      | 0 (0.0%)      |  |
| HEADACHE                           | Grade 1,2                          | 3 (6.7%)                      | 0 (0.0%)      | 0 (0.0%)                      | 0 (0.0%)      |  |
| HEAT RASH                          | Grade 2                            | 0 (0.0%)                      | 0 (0.0%)      | 0 (0.0%)                      | 0 (0.0%)      |  |
| INFLUENZA LIKE ILLNESS             | Grade 1,2                          | 0 (0.0%)                      | 0 (0.0%)      | 1 (5.9%)                      | 2 (11.1%)     |  |
| INJURY                             | Grade 2                            | 0 (0.0%)                      | 0 (0.0%)      | 0 (0.0%)                      | 0 (0.0%)      |  |
| JOINT SPRAIN                       | Grade 2                            | 0 (0.0%)                      | 0 (0.0%)      | 0 (0.0%)                      | 0 (0.0%)      |  |
| LACERATION                         | Grade 1                            | 0 (0.0%)                      | 0 (0.0%)      | 0 (0.0%)                      | 0 (0.0%)      |  |
| LARYNGITIS                         | Grade 2                            | 0 (0.0%)                      | 0 (0.0%)      | 0 (0.0%)                      | 0 (0.0%)      |  |
| LARYNGOTRACHEITIS                  | Grade 2                            | 0 (0.0%)                      | 0 (0.0%)      | 0 (0.0%)                      | 0 (0.0%)      |  |
| LOWER RESPIRATORY TRACT INFECTION  | Grade 2                            | 0 (0.0%)                      | 0 (0.0%)      | 0 (0.0%)                      | 0 (0.0%)      |  |

Centre 02: Moshi, Tanzania; Centre 03: Johannesburg, South Africa; Centre 04: Durban, South Africa  
Centre 05: DTHF, Cape Town, South Africa

| MedDRA Preferred Term  | Center 02                          |                            |               |                            | Center 03     |  |
|------------------------|------------------------------------|----------------------------|---------------|----------------------------|---------------|--|
|                        | Reported Severity<br>(DAIDS Grade) | Ring                       | Observation   | Ring                       | Observation   |  |
|                        |                                    | Intervention Phase<br>N=45 | Phase<br>N=45 | Intervention Phase<br>N=17 | Phase<br>N=18 |  |
| LYMPHADENOPATHY        | Grade 1                            | 0 (0.0%)                   | 0 (0.0%)      | 0 (0.0%)                   | 0 (0.0%)      |  |
| MALaise                | Grade 1                            | 0 (0.0%)                   | 0 (0.0%)      | 0 (0.0%)                   | 0 (0.0%)      |  |
| MALARIA                | Grade 2                            | 0 (0.0%)                   | 0 (0.0%)      | 0 (0.0%)                   | 0 (0.0%)      |  |
| MENORRHAGIA            | Grade 1,2                          | 0 (0.0%)                   | 0 (0.0%)      | 0 (0.0%)                   | 0 (0.0%)      |  |
| METrorrhagia           | Grade 1,2                          | 3 (6.7%)                   | 9 (20.0%)     | 0 (0.0%)                   | 0 (0.0%)      |  |
| MOUTH ULCERATION       | Grade 2                            | 0 (0.0%)                   | 0 (0.0%)      | 0 (0.0%)                   | 0 (0.0%)      |  |
| MUSCLE STRAIN          | Grade 1                            | 0 (0.0%)                   | 0 (0.0%)      | 0 (0.0%)                   | 0 (0.0%)      |  |
| NAIL TINEA             | Grade 2                            | 0 (0.0%)                   | 0 (0.0%)      | 0 (0.0%)                   | 0 (0.0%)      |  |
| NASOPHARYNGITIS        | Grade 1                            | 0 (0.0%)                   | 0 (0.0%)      | 0 (0.0%)                   | 0 (0.0%)      |  |
| NAUSEA                 | Grade 1                            | 0 (0.0%)                   | 0 (0.0%)      | 0 (0.0%)                   | 0 (0.0%)      |  |
| NECK PAIN              | Grade 2                            | 0 (0.0%)                   | 0 (0.0%)      | 0 (0.0%)                   | 0 (0.0%)      |  |
| PAIN                   | Grade 1                            | 1 (2.2%)                   | 0 (0.0%)      | 0 (0.0%)                   | 0 (0.0%)      |  |
| PALPITATIONS           | Grade 1                            | 0 (0.0%)                   | 0 (0.0%)      | 0 (0.0%)                   | 0 (0.0%)      |  |
| PEPTIC ULCER           | Grade 2                            | 0 (0.0%)                   | 0 (0.0%)      | 0 (0.0%)                   | 0 (0.0%)      |  |
| PERIORBITAL ABSCESS    | Grade 1                            | 0 (0.0%)                   | 1 (2.2%)      | 0 (0.0%)                   | 0 (0.0%)      |  |
| PHARYNGITIS            | Grade 1                            | 0 (0.0%)                   | 0 (0.0%)      | 0 (0.0%)                   | 0 (0.0%)      |  |
| PHARYNGOLARYNGEAL PAIN | Grade 1                            | 0 (0.0%)                   | 0 (0.0%)      | 0 (0.0%)                   | 0 (0.0%)      |  |
| PRURITUS GENITAL       | Grade 1                            | 0 (0.0%)                   | 0 (0.0%)      | 0 (0.0%)                   | 0 (0.0%)      |  |
| PYREXIA                | Grade 1                            | 0 (0.0%)                   | 0 (0.0%)      | 0 (0.0%)                   | 0 (0.0%)      |  |
| RASH                   | Grade 2                            | 0 (0.0%)                   | 0 (0.0%)      | 0 (0.0%)                   | 0 (0.0%)      |  |
| RASH GENERALISED       | Grade 1                            | 1 (2.2%)                   | 0 (0.0%)      | 0 (0.0%)                   | 0 (0.0%)      |  |
| RASH PRURITIC          | Grade 2                            | 0 (0.0%)                   | 0 (0.0%)      | 0 (0.0%)                   | 0 (0.0%)      |  |
| RASH PUSTULAR          | Grade 1                            | 0 (0.0%)                   | 0 (0.0%)      | 0 (0.0%)                   | 1 (5.6%)      |  |

Centre 02: Moshi, Tanzania; Centre 03: Johannesburg, South Africa; Centre 04: Durban, South Africa  
Centre 05: DTHF, Cape Town, South Africa

| MedDRA Preferred Term             | Reported Severity<br>(DAIDS Grade) | Centre 04                       |                           | Center 02                       |                           |
|-----------------------------------|------------------------------------|---------------------------------|---------------------------|---------------------------------|---------------------------|
|                                   |                                    | Ring Intervention Phase<br>N=45 | Observation Phase<br>N=45 | Ring Intervention Phase<br>N=17 | Observation Phase<br>N=18 |
|                                   |                                    | RASH VESICULAR                  | Grade 1                   | 0 (0.0%)                        | 0 (0.0%)                  |
| SINUS HEADACHE                    | Grade 1                            | 0 (0.0%)                        | 0 (0.0%)                  | 0 (0.0%)                        | 0 (0.0%)                  |
| SINUSITIS                         | Grade 1,2                          | 0 (0.0%)                        | 0 (0.0%)                  | 0 (0.0%)                        | 0 (0.0%)                  |
| SKIN LACERATION                   | Grade 2                            | 0 (0.0%)                        | 0 (0.0%)                  | 0 (0.0%)                        | 0 (0.0%)                  |
| SOFT TISSUE INFECTION             | Grade 1                            | 0 (0.0%)                        | 0 (0.0%)                  | 0 (0.0%)                        | 1 (5.6%)                  |
| SOFT TISSUE INJURY                | Grade 1                            | 0 (0.0%)                        | 1 (2.2%)                  | 0 (0.0%)                        | 0 (0.0%)                  |
| STRESS                            | Grade 2                            | 0 (0.0%)                        | 0 (0.0%)                  | 0 (0.0%)                        | 0 (0.0%)                  |
| SUBCUTANEOUS ABSCESS              | Grade 2                            | 0 (0.0%)                        | 0 (0.0%)                  | 1 (5.9%)                        | 0 (0.0%)                  |
| TINEA INFECTION                   | Grade 2                            | 0 (0.0%)                        | 0 (0.0%)                  | 0 (0.0%)                        | 0 (0.0%)                  |
| TONSILLITIS                       | Grade 2                            | 0 (0.0%)                        | 0 (0.0%)                  | 1 (5.9%)                        | 0 (0.0%)                  |
| TOOTH INJURY                      | Grade 2                            | 0 (0.0%)                        | 0 (0.0%)                  | 0 (0.0%)                        | 0 (0.0%)                  |
| TOOTHACHE                         | Grade 1,2                          | 0 (0.0%)                        | 0 (0.0%)                  | 0 (0.0%)                        | 0 (0.0%)                  |
| UPPER RESPIRATORY TRACT INFECTION | Grade 1,2                          | 4 (8.9%)                        | 1 (2.2%)                  | 1 (5.9%)                        | 5 (27.8%)                 |
| URINARY TRACT INFECTION           | Grade 1,2                          | 3 (6.7%)                        | 3 (6.7%)                  | 0 (0.0%)                        | 0 (0.0%)                  |
| UTERINE PAIN                      | Grade 1                            | 0 (0.0%)                        | 0 (0.0%)                  | 0 (0.0%)                        | 0 (0.0%)                  |
| UTERINE SPASM                     | Grade 1,2                          | 0 (0.0%)                        | 0 (0.0%)                  | 0 (0.0%)                        | 0 (0.0%)                  |
| VAGINAL CANDIDIASIS               | Grade 1,2                          | 8 (17.8%)                       | 10 (22.2%)                | 4 (23.5%)                       | 2 (11.1%)                 |
| VAGINAL DISCHARGE                 | Grade 1                            | 2 (4.4%)                        | 3 (6.7%)                  | 2 (11.8%)                       | 0 (0.0%)                  |
| VAGINAL ERYTHEMA                  | Grade 1                            | 0 (0.0%)                        | 0 (0.0%)                  | 0 (0.0%)                        | 0 (0.0%)                  |
| VAGINAL INFECTION                 | Grade 2                            | 0 (0.0%)                        | 0 (0.0%)                  | 0 (0.0%)                        | 0 (0.0%)                  |
| VAGINAL LACERATION                | Grade 2                            | 0 (0.0%)                        | 0 (0.0%)                  | 1 (5.9%)                        | 0 (0.0%)                  |
| VAGINAL ODOUR                     | Grade 1                            | 0 (0.0%)                        | 0 (0.0%)                  | 0 (0.0%)                        | 0 (0.0%)                  |
| VAGINAL PAIN                      | Grade 1                            | 1 (2.2%)                        | 0 (0.0%)                  | 0 (0.0%)                        | 0 (0.0%)                  |

Centre 02: Moshi, Tanzania; Centre 03: Johannesburg, South Africa; Centre 04: Durban, South Africa  
Centre 05: DTHF, Cape Town, South Africa

| MedDRA Preferred Term      | Reported Severity (DAIDS Grade) | Center 02                    |                        | Center 03                    |                        |
|----------------------------|---------------------------------|------------------------------|------------------------|------------------------------|------------------------|
|                            |                                 | Ring Intervention Phase N=45 | Observation Phase N=45 | Ring Intervention Phase N=17 | Observation Phase N=18 |
| VAGINITIS BACTERIAL        | Grade 1,2                       | 6 (13.3%)                    | 5 (11.1%)              | 2 (11.8%)                    | 2 (11.1%)              |
| VIRAL RHINITIS             | Grade 1                         | 0 (0.0%)                     | 0 (0.0%)               | 0 (0.0%)                     | 0 (0.0%)               |
| VULVAL ERYTHEMA            | Grade 1                         | 0 (0.0%)                     | 0 (0.0%)               | 0 (0.0%)                     | 0 (0.0%)               |
| VULVAR EROSION             | Grade 1                         | 0 (0.0%)                     | 0 (0.0%)               | 0 (0.0%)                     | 0 (0.0%)               |
| VULVOVAGINAL DISCOMFORT    | Grade 1                         | 0 (0.0%)                     | 0 (0.0%)               | 2 (11.8%)                    | 1 (5.6%)               |
| VULVOVAGINAL DRYNESS       | Grade 1                         | 0 (0.0%)                     | 0 (0.0%)               | 0 (0.0%)                     | 0 (0.0%)               |
| VULVOVAGINAL PRURITUS      | Grade 1                         | 1 (2.2%)                     | 0 (0.0%)               | 0 (0.0%)                     | 0 (0.0%)               |
| VULVOVAGINITIS TRICHOMONAL | Grade 1,2                       | 1 (2.2%)                     | 2 (4.4%)               | 0 (0.0%)                     | 0 (0.0%)               |

Centre 02: Moshi, Tanzania; Centre 03: Johannesburg, South Africa; Centre 04: Durban, South Africa  
Centre 05: DTHF, Cape Town, South Africa

| MedDRA Preferred Term              | Reported Severity (DAIDS Grade) | Overall                       |                         |
|------------------------------------|---------------------------------|-------------------------------|-------------------------|
|                                    |                                 | Ring Intervention Phase N=158 | Observation Phase N=161 |
| Participant with Any Adverse Event |                                 | 100 (63.3%)                   | 107 (66.5%)             |
| ABDOMINAL MASS                     | Grade 1                         | 1 (0.6%)                      | 0 (0.0%)                |
| ABDOMINAL PAIN                     | Grade 1,2,3                     | 1 (0.6%)                      | 3 (1.9%)                |
| ABDOMINAL PAIN LOWER               | Grade 1,2                       | 5 (3.2%)                      | 3 (1.9%)                |
| ABDOMINAL PAIN UPPER               | Grade 2                         | 0 (0.0%)                      | 0 (0.0%)                |
| ABDOMINAL TENDERNESS               | Grade 1                         | 1 (0.6%)                      | 0 (0.0%)                |
| ABSCESS LIMB                       | Grade 2                         | 2 (1.3%)                      | 0 (0.0%)                |
| ADNEXA UTERI PAIN                  | Grade 1                         | 1 (0.6%)                      | 1 (0.6%)                |
| ANXIETY                            | Grade 2                         | 1 (0.6%)                      | 0 (0.0%)                |
| APPENDICITIS                       | Grade 3                         | 1 (0.6%)                      | 0 (0.0%)                |
| ARTHRALGIA                         | Grade 2                         | 0 (0.0%)                      | 1 (0.6%)                |
| ASCARIASIS                         | Grade 2                         | 0 (0.0%)                      | 1 (0.6%)                |
| ASTHMA                             | Grade 1                         | 1 (0.6%)                      | 1 (0.6%)                |
| BACK PAIN                          | Grade 1                         | 2 (1.3%)                      | 1 (0.6%)                |
| BREAST PAIN                        | Grade 1                         | 1 (0.6%)                      | 0 (0.0%)                |
| BRONCHIAL HYPERREACTIVITY          | Grade 1                         | 0 (0.0%)                      | 1 (0.6%)                |
| BRONCHITIS                         | Grade 2                         | 5 (3.2%)                      | 4 (2.5%)                |
| CERVICAL DISCHARGE                 | Grade 1                         | 1 (0.6%)                      | 0 (0.0%)                |
| CERVICITIS                         | Grade 1,2                       | 0 (0.0%)                      | 1 (0.6%)                |
| CERVIX ERYTHEMA                    | Grade 1                         | 2 (1.3%)                      | 1 (0.6%)                |
| CERVIX HAEMORRHAGE UTERINE         | Grade 1                         | 1 (0.6%)                      | 0 (0.0%)                |
| CHEST PAIN                         | Grade 1                         | 0 (0.0%)                      | 1 (0.6%)                |

Centre 02: Moshi, Tanzania; Centre 03: Johannesburg, South Africa; Centre 04: Durban, South Africa  
 Centre 05: DTHF, Cape Town, South Africa

| MedDRA Preferred Term  | Overall                         |                               |                         |
|------------------------|---------------------------------|-------------------------------|-------------------------|
|                        | Reported Severity (DAIDS Grade) | Ring Intervention Phase N=158 | Observation Phase N=161 |
| COITAL BLEEDING        | Grade 1                         | 1 (0.6%)                      | 0 (0.0%)                |
| CONSTIPATION           | Grade 1                         | 0 (0.0%)                      | 1 (0.6%)                |
| CONTUSION              | Grade 2                         | 1 (0.6%)                      | 0 (0.0%)                |
| CONVERSION DISORDER    | Grade 2                         | 0 (0.0%)                      | 0 (0.0%)                |
| COUGH                  | Grade 1,2                       | 4 (2.5%)                      | 0 (0.0%)                |
| CYSTITIS               | Grade 1,2,3                     | 2 (1.3%)                      | 2 (1.2%)                |
| DEAFNESS UNILATERAL    | Grade 2                         | 1 (0.6%)                      | 0 (0.0%)                |
| DEPRESSION             | Grade 2                         | 1 (0.6%)                      | 0 (0.0%)                |
| DERMATITIS ALLERGIC    | Grade 1,2                       | 1 (0.6%)                      | 1 (0.6%)                |
| DIARRHOEA              | Grade 1,2                       | 4 (2.5%)                      | 2 (1.2%)                |
| DIZZINESS              | Grade 1                         | 3 (1.9%)                      | 1 (0.6%)                |
| DYSENTERY              | Grade 2                         | 1 (0.6%)                      | 0 (0.0%)                |
| DYSMENORRHOEA          | Grade 1,2                       | 5 (3.2%)                      | 5 (3.1%)                |
| DYSPAREUNIA            | Grade 1                         | 1 (0.6%)                      | 1 (0.6%)                |
| DYSURIA                | Grade 1                         | 1 (0.6%)                      | 0 (0.0%)                |
| EAR PAIN               | Grade 1                         | 0 (0.0%)                      | 1 (0.6%)                |
| EAR PRURITUS           | Grade 2                         | 1 (0.6%)                      | 0 (0.0%)                |
| ECZEMA                 | Grade 1,2                       | 1 (0.6%)                      | 1 (0.6%)                |
| EPISTAXIS              | Grade 1                         | 2 (1.3%)                      | 0 (0.0%)                |
| FATIGUE                | Grade 1,2                       | 1 (0.6%)                      | 1 (0.6%)                |
| FIBROADENOMA OF BREAST | Grade 1                         | 1 (0.6%)                      | 0 (0.0%)                |
| FOLLICULITIS           | Grade 1                         | 1 (0.6%)                      | 3 (1.9%)                |
| FOOT FRACTURE          | Grade 2                         | 0 (0.0%)                      | 0 (0.0%)                |

Centre 02: Moshi, Tanzania; Centre 03: Johannesburg, South Africa; Centre 04: Durban, South Africa  
Centre 05: DTHF, Cape Town, South Africa

| MedDRA Preferred Term              | Overall                         |                               |                         |
|------------------------------------|---------------------------------|-------------------------------|-------------------------|
|                                    | Reported Severity (DAIDS Grade) | Ring Intervention Phase N=158 | Observation Phase N=161 |
| GASTRITIS                          | Grade 1,2                       | 1 (0.6%)                      | 1 (0.6%)                |
| GASTROENTERITIS                    | Grade 2                         | 1 (0.6%)                      | 0 (0.0%)                |
| GASTROENTERITIS SHIGELLA           | Grade 2                         | 0 (0.0%)                      | 2 (1.2%)                |
| GENITAL BURNING SENSATION          | Grade 1                         | 1 (0.6%)                      | 0 (0.0%)                |
| GENITAL DISCOMFORT                 | Grade 1                         | 1 (0.6%)                      | 0 (0.0%)                |
| GENITAL EROSION                    | Grade 1                         | 2 (1.3%)                      | 1 (0.6%)                |
| GENITAL ERYTHEMA                   | Grade 1                         | 1 (0.6%)                      | 0 (0.0%)                |
| GENITAL HERPES                     | Grade 1,2                       | 2 (1.3%)                      | 3 (1.9%)                |
| GENITAL PAIN                       | Grade 1                         | 1 (0.6%)                      | 0 (0.0%)                |
| GINGIVAL ULCERATION                | Grade 1                         | 1 (0.6%)                      | 0 (0.0%)                |
| GONORRHOEA                         | Grade 1,2                       | 3 (1.9%)                      | 3 (1.9%)                |
| GYNAECOLOGICAL CHLAMYDIA INFECTION | Grade 1,2                       | 6 (3.8%)                      | 9 (5.6%)                |
| HAEMORRHOIDS                       | Grade 1,2                       | 1 (0.6%)                      | 1 (0.6%)                |
| HEAD INJURY                        | Grade 2                         | 0 (0.0%)                      | 1 (0.6%)                |
| HEADACHE                           | Grade 1,2                       | 13 (8.2%)                     | 10 (6.2%)               |
| HEAT RASH                          | Grade 2                         | 0 (0.0%)                      | 0 (0.0%)                |
| INFLUENZA LIKE ILLNESS             | Grade 1,2                       | 12 (7.6%)                     | 16 (9.9%)               |
| INJURY                             | Grade 2                         | 1 (0.6%)                      | 0 (0.0%)                |
| JOINT SPRAIN                       | Grade 2                         | 1 (0.6%)                      | 1 (0.6%)                |
| LACERATION                         | Grade 1                         | 0 (0.0%)                      | 1 (0.6%)                |
| LARYNGITIS                         | Grade 2                         | 4 (2.5%)                      | 3 (1.9%)                |
| LARYNGOTRACHEITIS                  | Grade 2                         | 1 (0.6%)                      | 0 (0.0%)                |
| LOWER RESPIRATORY TRACT INFECTION  | Grade 2                         | 1 (0.6%)                      | 0 (0.0%)                |

Centre 02: Moshi, Tanzania; Centre 03: Johannesburg, South Africa; Centre 04: Durban, South Africa  
Centre 05: DTHF, Cape Town, South Africa

| MedDRA Preferred Term  | Overall                         |                               |                         |
|------------------------|---------------------------------|-------------------------------|-------------------------|
|                        | Reported Severity (DAIDS Grade) | Ring Intervention Phase N=158 | Observation Phase N=161 |
| LYMPHADENOPATHY        | Grade 1                         | 1 (0.6%)                      | 0 (0.0%)                |
| MALAISE                | Grade 1                         | 2 (1.3%)                      | 0 (0.0%)                |
| MALARIA                | Grade 2                         | 4 (2.5%)                      | 2 (1.2%)                |
| MENORRHAGIA            | Grade 1,2                       | 2 (1.3%)                      | 3 (1.9%)                |
| METRORRHAGIA           | Grade 1,2                       | 9 (5.7%)                      | 17 (10.6%)              |
| MOUTH ULCERATION       | Grade 2                         | 0 (0.0%)                      | 0 (0.0%)                |
| MUSCLE STRAIN          | Grade 1                         | 1 (0.6%)                      | 1 (0.6%)                |
| NAIL TINEA             | Grade 2                         | 0 (0.0%)                      | 0 (0.0%)                |
| NASOPHARYNGITIS        | Grade 1                         | 0 (0.0%)                      | 1 (0.6%)                |
| NAUSEA                 | Grade 1                         | 0 (0.0%)                      | 2 (1.2%)                |
| NECK PAIN              | Grade 2                         | 2 (1.3%)                      | 0 (0.0%)                |
| PAIN                   | Grade 1                         | 1 (0.6%)                      | 0 (0.0%)                |
| PALPITATIONS           | Grade 1                         | 1 (0.6%)                      | 0 (0.0%)                |
| PEPTIC ULCER           | Grade 2                         | 0 (0.0%)                      | 0 (0.0%)                |
| PERIORBITAL ABSCESS    | Grade 1                         | 0 (0.0%)                      | 1 (0.6%)                |
| PHARYNGITIS            | Grade 1                         | 1 (0.6%)                      | 1 (0.6%)                |
| PHARYNGOLARYNGEAL PAIN | Grade 1                         | 0 (0.0%)                      | 1 (0.6%)                |
| PRURITUS GENITAL       | Grade 1                         | 3 (1.9%)                      | 0 (0.0%)                |
| PYREXIA                | Grade 1                         | 0 (0.0%)                      | 1 (0.6%)                |
| RASH                   | Grade 2                         | 0 (0.0%)                      | 1 (0.6%)                |
| RASH GENERALISED       | Grade 1                         | 1 (0.6%)                      | 0 (0.0%)                |
| RASH PRURITIC          | Grade 2                         | 2 (1.3%)                      | 0 (0.0%)                |
| RASH PUSTULAR          | Grade 1                         | 0 (0.0%)                      | 1 (0.6%)                |

Centre 02: Moshi, Tanzania; Centre 03: Johannesburg, South Africa; Centre 04: Durban, South Africa  
Centre 05: DTHF, Cape Town, South Africa



| MedDRA Preferred Term             | Overall                         |                               |                         |
|-----------------------------------|---------------------------------|-------------------------------|-------------------------|
|                                   | Reported Severity (DAIDS Grade) | Ring Intervention Phase N=158 | Observation Phase N=161 |
| RASH VESICULAR                    | Grade 1                         | 0 (0.0%)                      | 1 (0.6%)                |
| SINUS HEADACHE                    | Grade 1                         | 0 (0.0%)                      | 1 (0.6%)                |
| SINUSITIS                         | Grade 1,2                       | 3 (1.9%)                      | 2 (1.2%)                |
| SKIN LACERATION                   | Grade 2                         | 1 (0.6%)                      | 0 (0.0%)                |
| SOFT TISSUE INFECTION             | Grade 1                         | 0 (0.0%)                      | 1 (0.6%)                |
| SOFT TISSUE INJURY                | Grade 1                         | 0 (0.0%)                      | 1 (0.6%)                |
| STRESS                            | Grade 2                         | 1 (0.6%)                      | 0 (0.0%)                |
| SUBCUTANEOUS ABSCESS              | Grade 2                         | 1 (0.6%)                      | 1 (0.6%)                |
| TINEA INFECTION                   | Grade 2                         | 0 (0.0%)                      | 0 (0.0%)                |
| TONSILLITIS                       | Grade 2                         | 6 (3.8%)                      | 2 (1.2%)                |
| TOOTH INJURY                      | Grade 2                         | 1 (0.6%)                      | 0 (0.0%)                |
| TOOTHACHE                         | Grade 1,2                       | 2 (1.3%)                      | 0 (0.0%)                |
| UPPER RESPIRATORY TRACT INFECTION | Grade 1,2                       | 5 (3.2%)                      | 10 (6.2%)               |
| URINARY TRACT INFECTION           | Grade 1,2                       | 7 (4.4%)                      | 3 (1.9%)                |
| UTERINE PAIN                      | Grade 1                         | 1 (0.6%)                      | 1 (0.6%)                |
| UTERINE SPASM                     | Grade 1,2                       | 0 (0.0%)                      | 2 (1.2%)                |
| VAGINAL CANDIDIASIS               | Grade 1,2                       | 18 (11.4%)                    | 17 (10.6%)              |
| VAGINAL DISCHARGE                 | Grade 1                         | 7 (4.4%)                      | 3 (1.9%)                |
| VAGINAL ERYTHEMA                  | Grade 1                         | 0 (0.0%)                      | 1 (0.6%)                |
| VAGINAL INFECTION                 | Grade 2                         | 0 (0.0%)                      | 0 (0.0%)                |
| VAGINAL LACERATION                | Grade 2                         | 1 (0.6%)                      | 0 (0.0%)                |
| VAGINAL ODOUR                     | Grade 1                         | 3 (1.9%)                      | 1 (0.6%)                |
| VAGINAL PAIN                      | Grade 1                         | 1 (0.6%)                      | 0 (0.0%)                |

Centre 02: Moshi, Tanzania; Centre 03: Johannesburg, South Africa; Centre 04: Durban, South Africa  
Centre 05: DTHF, Cape Town, South Africa

| MedDRA Preferred Term      | Overall                         |                               |                        |
|----------------------------|---------------------------------|-------------------------------|------------------------|
|                            | Reported Severity (DAIDS Grade) | Ring Intervention Phase N=158 | Observation Phas N=161 |
| VAGINITIS BACTERIAL        | Grade 1,2                       | 15 (9.5%)                     | 13 (8.1%)              |
| VIRAL RHINITIS             | Grade 1                         | 0 (0.0%)                      | 1 (0.6%)               |
| VULVAL ERYTHEMA            | Grade 1                         | 1 (0.6%)                      | 0 (0.0%)               |
| VULVAR EROSION             | Grade 1                         | 0 (0.0%)                      | 1 (0.6%)               |
| VULVOVAGINAL DISCOMFORT    | Grade 1                         | 2 (1.3%)                      | 1 (0.6%)               |
| VULVOVAGINAL DRYNESS       | Grade 1                         | 0 (0.0%)                      | 1 (0.6%)               |
| VULVOVAGINAL PRURITUS      | Grade 1                         | 2 (1.3%)                      | 2 (1.2%)               |
| VULVOVAGINITIS TRICHOMONAL | Grade 1,2                       | 1 (0.6%)                      | 3 (1.9%)               |

Centre 02: Moshi, Tanzania; Centre 03: Johannesburg, South Africa; Centre 04: Durban, South Africa  
 Centre 05: DTHF, Cape Town, South Africa
