# Supplementary material for: Safety of a silicone elastomer vaginal ring as potential microbicide delivery method in African women: A Phase 1 randomized trial
Source: PubMed Central journal article supplement (PMC5973569; doi:10.1371/journal.pone.0196904), 2018-05-29
Supplement: pone.0196904.s006.pdf [file pone.0196904.s006.pdf]

**S4 Table. Summary for Adverse Event Occurrence Rates by Sequence Assignment**

| MedDRA Preferred Term              | Reported Severity (DAIDS Grade) | Group A N=87 | Group B N=82 | Total N=169 |
|------------------------------------|---------------------------------|--------------|--------------|-------------|
| Participant with Any Adverse Event |                                 | 73 (83.9%)   | 65 (79.3%)   | 138 (81.7%) |
| ABDOMINAL MASS                     | Grade 1                         | 1 (1.1%)     | 0 (0.0%)     | 1 (0.6%)    |
| ABDOMINAL PAIN                     | Grade 1,2,3                     | 4 (4.6%)     | 0 (0.0%)     | 4 (2.4%)    |
| ABDOMINAL PAIN LOWER               | Grade 1,2                       | 6 (6.9%)     | 2 (2.4%)     | 8 (4.7%)    |
| ABDOMINAL PAIN UPPER               | Grade 2                         | 0 (0.0%)     | 0 (0.0%)     | 0 (0.0%)    |
| ABDOMINAL TENDERNESS               | Grade 1                         | 1 (1.1%)     | 0 (0.0%)     | 1 (0.6%)    |
| ABSCESS LIMB                       | Grade 2                         | 2 (2.3%)     | 0 (0.0%)     | 2 (1.2%)    |
| ADNEXA UTERI PAIN                  | Grade 1                         | 0 (0.0%)     | 2 (2.4%)     | 2 (1.2%)    |
| ANXIETY                            | Grade 2                         | 1 (1.1%)     | 0 (0.0%)     | 1 (0.6%)    |
| APPENDICITIS                       | Grade 3                         | 1 (1.1%)     | 0 (0.0%)     | 1 (0.6%)    |
| ARTHRALGIA                         | Grade 2                         | 0 (0.0%)     | 1 (1.2%)     | 1 (0.6%)    |
| ASCARIASIS                         | Grade 2                         | 1 (1.1%)     | 0 (0.0%)     | 1 (0.6%)    |
| ASTHMA                             | Grade 1                         | 1 (1.1%)     | 1 (1.2%)     | 2 (1.2%)    |
| BACK PAIN                          | Grade 1                         | 2 (2.3%)     | 1 (1.2%)     | 3 (1.8%)    |
| BREAST PAIN                        | Grade 1                         | 1 (1.1%)     | 0 (0.0%)     | 1 (0.6%)    |
| BRONCHIAL HYPERREACTIVITY          | Grade 1                         | 0 (0.0%)     | 1 (1.2%)     | 1 (0.6%)    |
| BRONCHITIS                         | Grade 2                         | 5 (5.7%)     | 3 (3.7%)     | 8 (4.7%)    |
| CERVICAL DISCHARGE                 | Grade 1                         | 0 (0.0%)     | 1 (1.2%)     | 1 (0.6%)    |
| CERVICITIS                         | Grade 1,2                       | 0 (0.0%)     | 1 (1.2%)     | 1 (0.6%)    |
| CERVIX ERYTHEMA                    | Grade 1                         | 2 (2.3%)     | 1 (1.2%)     | 3 (1.8%)    |
| CERVIX HAEMORRHAGE UTERINE         | Grade 1                         | 1 (1.1%)     | 0 (0.0%)     | 1 (0.6%)    |
| CHEST PAIN                         | Grade 1                         | 1 (1.1%)     | 0 (0.0%)     | 1 (0.6%)    |
| COITAL BLEEDING                    | Grade 1                         | 1 (1.1%)     | 0 (0.0%)     | 1 (0.6%)    |
| CONSTIPATION                       | Grade 1                         | 0 (0.0%)     | 1 (1.2%)     | 1 (0.6%)    |

Centre 02: Moshi, Tanzania; Centre 03: Johannesburg, South Africa; Centre 04: Durban, South Africa  
 Centre 05: DTHF, Cape Town, South Africa

| MedDRA Preferred Term    | Reported Severity (DAIDS Grade) | Group A N=87 | Group B N=82 | Total N=169 |
|--------------------------|---------------------------------|--------------|--------------|-------------|
| CONTUSION                | Grade 2                         | 1 (1.1%)     | 0 (0.0%)     | 1 (0.6%)    |
| CONVERSION DISORDER      | Grade 2                         | 0 (0.0%)     | 0 (0.0%)     | 0 (0.0%)    |
| COUGH                    | Grade 1,2                       | 4 (4.6%)     | 0 (0.0%)     | 4 (2.4%)    |
| CYSTITIS                 | Grade 1,2,3                     | 3 (3.4%)     | 1 (1.2%)     | 4 (2.4%)    |
| DEAFNESS UNILATERAL      | Grade 2                         | 1 (1.1%)     | 0 (0.0%)     | 1 (0.6%)    |
| DEPRESSION               | Grade 2                         | 1 (1.1%)     | 0 (0.0%)     | 1 (0.6%)    |
| DERMATITIS ALLERGIC      | Grade 1,2                       | 1 (1.1%)     | 1 (1.2%)     | 2 (1.2%)    |
| DIARRHOEA                | Grade 1,2                       | 2 (2.3%)     | 4 (4.9%)     | 6 (3.6%)    |
| DIZZINESS                | Grade 1                         | 2 (2.3%)     | 1 (1.2%)     | 3 (1.8%)    |
| DYSENTERY                | Grade 2                         | 1 (1.1%)     | 0 (0.0%)     | 1 (0.6%)    |
| DYSMENORRHOEA            | Grade 1,2                       | 5 (5.7%)     | 3 (3.7%)     | 8 (4.7%)    |
| DYSPAREUNIA              | Grade 1                         | 1 (1.1%)     | 1 (1.2%)     | 2 (1.2%)    |
| DYSURIA                  | Grade 1                         | 0 (0.0%)     | 1 (1.2%)     | 1 (0.6%)    |
| EAR PAIN                 | Grade 1                         | 1 (1.1%)     | 0 (0.0%)     | 1 (0.6%)    |
| EAR PRURITUS             | Grade 2                         | 0 (0.0%)     | 1 (1.2%)     | 1 (0.6%)    |
| ECZEMA                   | Grade 1,2                       | 2 (2.3%)     | 0 (0.0%)     | 2 (1.2%)    |
| EPISTAXIS                | Grade 1                         | 1 (1.1%)     | 1 (1.2%)     | 2 (1.2%)    |
| FATIGUE                  | Grade 1,2                       | 1 (1.1%)     | 1 (1.2%)     | 2 (1.2%)    |
| FIBROADENOMA OF BREAST   | Grade 1                         | 1 (1.1%)     | 0 (0.0%)     | 1 (0.6%)    |
| FOLLICULITIS             | Grade 1                         | 2 (2.3%)     | 1 (1.2%)     | 3 (1.8%)    |
| FOOT FRACTURE            | Grade 2                         | 0 (0.0%)     | 0 (0.0%)     | 0 (0.0%)    |
| GASTRITIS                | Grade 1,2                       | 0 (0.0%)     | 2 (2.4%)     | 2 (1.2%)    |
| GASTROENTERITIS          | Grade 2                         | 1 (1.1%)     | 0 (0.0%)     | 1 (0.6%)    |
| GASTROENTERITIS SHIGELLA | Grade 2                         | 1 (1.1%)     | 1 (1.2%)     | 2 (1.2%)    |

Centre 02: Moshi, Tanzania; Centre 03: Johannesburg, South Africa; Centre 04: Durban, South Africa  
Centre 05: DTHF, Cape Town, South Africa

| MedDRA Preferred Term              | Reported Severity (DAIDS Grade) | Group A N=87 | Group B N=82 | Total N=169 |
|------------------------------------|---------------------------------|--------------|--------------|-------------|
| GENITAL BURNING SENSATION          | Grade 1                         | 1 (1.1%)     | 0 (0.0%)     | 1 (0.6%)    |
| GENITAL DISCOMFORT                 | Grade 1                         | 0 (0.0%)     | 1 (1.2%)     | 1 (0.6%)    |
| GENITAL EROSION                    | Grade 1                         | 2 (2.3%)     | 1 (1.2%)     | 3 (1.8%)    |
| GENITAL ERYTHEMA                   | Grade 1                         | 0 (0.0%)     | 1 (1.2%)     | 1 (0.6%)    |
| GENITAL HERPES                     | Grade 1,2                       | 4 (4.6%)     | 0 (0.0%)     | 4 (2.4%)    |
| GENITAL PAIN                       | Grade 1                         | 0 (0.0%)     | 1 (1.2%)     | 1 (0.6%)    |
| GINGIVAL ULCERATION                | Grade 1                         | 0 (0.0%)     | 1 (1.2%)     | 1 (0.6%)    |
| GONORRHOEA                         | Grade 1,2                       | 3 (3.4%)     | 3 (3.7%)     | 6 (3.6%)    |
| GYNAECOLOGICAL CHLAMYDIA INFECTION | Grade 1,2                       | 10 (11.5%)   | 5 (6.1%)     | 15 (8.9%)   |
| HAEMORRHOIDS                       | Grade 1,2                       | 0 (0.0%)     | 1 (1.2%)     | 1 (0.6%)    |
| HEAD INJURY                        | Grade 2                         | 1 (1.1%)     | 0 (0.0%)     | 1 (0.6%)    |
| HEADACHE                           | Grade 1,2                       | 15 (17.2%)   | 6 (7.3%)     | 21 (12.4%)  |
| HEAT RASH                          | Grade 2                         | 0 (0.0%)     | 0 (0.0%)     | 0 (0.0%)    |
| INFLUENZA LIKE ILLNESS             | Grade 1,2                       | 11 (12.6%)   | 15 (18.3%)   | 26 (15.4%)  |
| INJURY                             | Grade 2                         | 1 (1.1%)     | 0 (0.0%)     | 1 (0.6%)    |
| JOINT SPRAIN                       | Grade 2                         | 1 (1.1%)     | 1 (1.2%)     | 2 (1.2%)    |
| LACERATION                         | Grade 1                         | 1 (1.1%)     | 0 (0.0%)     | 1 (0.6%)    |
| LARYNGITIS                         | Grade 2                         | 3 (3.4%)     | 3 (3.7%)     | 6 (3.6%)    |
| LARYNGOTRACHEITIS                  | Grade 2                         | 1 (1.1%)     | 0 (0.0%)     | 1 (0.6%)    |
| LOWER RESPIRATORY TRACT INFECTION  | Grade 2                         | 0 (0.0%)     | 1 (1.2%)     | 1 (0.6%)    |
| LYMPHADENOPATHY                    | Grade 1                         | 0 (0.0%)     | 1 (1.2%)     | 1 (0.6%)    |
| MALAISE                            | Grade 1                         | 0 (0.0%)     | 2 (2.4%)     | 2 (1.2%)    |
| MALARIA                            | Grade 2                         | 2 (2.3%)     | 3 (3.7%)     | 5 (3.0%)    |
| MENORRHAGIA                        | Grade 1,2                       | 3 (3.4%)     | 1 (1.2%)     | 4 (2.4%)    |
| METRORRHAGIA                       | Grade 1,2                       | 8 (9.2%)     | 15 (18.3%)   | 23 (13.6%)  |

Centre 02: Moshi, Tanzania; Centre 03: Johannesburg, South Africa; Centre 04: Durban, South Africa  
Centre 05: DTHF, Cape Town, South Africa

| MedDRA Preferred Term  | Reported Severity (DAIDS Grade) | Group A N=87 | Group B N=82 | Total N=169 |
|------------------------|---------------------------------|--------------|--------------|-------------|
| MOUTH ULCERATION       | Grade 2                         | 0 (0.0%)     | 0 (0.0%)     | 0 (0.0%)    |
| MUSCLE STRAIN          | Grade 1                         | 1 (1.1%)     | 1 (1.2%)     | 2 (1.2%)    |
| NAIL TINEA             | Grade 2                         | 0 (0.0%)     | 0 (0.0%)     | 0 (0.0%)    |
| NASOPHARYNGITIS        | Grade 1                         | 0 (0.0%)     | 1 (1.2%)     | 1 (0.6%)    |
| NAUSEA                 | Grade 1                         | 2 (2.3%)     | 0 (0.0%)     | 2 (1.2%)    |
| NECK PAIN              | Grade 2                         | 2 (2.3%)     | 0 (0.0%)     | 2 (1.2%)    |
| PAIN                   | Grade 1                         | 1 (1.1%)     | 0 (0.0%)     | 1 (0.6%)    |
| PALPITATIONS           | Grade 1                         | 0 (0.0%)     | 1 (1.2%)     | 1 (0.6%)    |
| PEPTIC ULCER           | Grade 2                         | 0 (0.0%)     | 0 (0.0%)     | 0 (0.0%)    |
| PERIORBITAL ABSCESS    | Grade 1                         | 0 (0.0%)     | 1 (1.2%)     | 1 (0.6%)    |
| PHARYNGITIS            | Grade 1                         | 1 (1.1%)     | 1 (1.2%)     | 2 (1.2%)    |
| PHARYNGOLARYNGEAL PAIN | Grade 1                         | 0 (0.0%)     | 1 (1.2%)     | 1 (0.6%)    |
| PRURITUS GENITAL       | Grade 1                         | 0 (0.0%)     | 3 (3.7%)     | 3 (1.8%)    |
| PYREXIA                | Grade 1                         | 0 (0.0%)     | 1 (1.2%)     | 1 (0.6%)    |
| RASH                   | Grade 2                         | 1 (1.1%)     | 0 (0.0%)     | 1 (0.6%)    |
| RASH GENERALISED       | Grade 1                         | 1 (1.1%)     | 0 (0.0%)     | 1 (0.6%)    |
| RASH PRURITIC          | Grade 2                         | 1 (1.1%)     | 1 (1.2%)     | 2 (1.2%)    |
| RASH PUSTULAR          | Grade 1                         | 0 (0.0%)     | 1 (1.2%)     | 1 (0.6%)    |
| RASH VESICULAR         | Grade 1                         | 1 (1.1%)     | 0 (0.0%)     | 1 (0.6%)    |
| SINUS HEADACHE         | Grade 1                         | 1 (1.1%)     | 0 (0.0%)     | 1 (0.6%)    |
| SINUSITIS              | Grade 1,2                       | 1 (1.1%)     | 3 (3.7%)     | 4 (2.4%)    |
| SKIN LACERATION        | Grade 2                         | 1 (1.1%)     | 0 (0.0%)     | 1 (0.6%)    |
| SOFT TISSUE INFECTION  | Grade 1                         | 0 (0.0%)     | 1 (1.2%)     | 1 (0.6%)    |
| SOFT TISSUE INJURY     | Grade 1                         | 0 (0.0%)     | 1 (1.2%)     | 1 (0.6%)    |
| STRESS                 | Grade 2                         | 1 (1.1%)     | 0 (0.0%)     | 1 (0.6%)    |

Centre 02: Moshi, Tanzania; Centre 03: Johannesburg, South Africa; Centre 04: Durban, South Africa  
Centre 05: DTHF, Cape Town, South Africa

| MedDRA Preferred Term             | Reported Severity (DAIDS Grade) | Group A N=87 | Group B N=82 | Total N=169 |
|-----------------------------------|---------------------------------|--------------|--------------|-------------|
| SUBCUTANEOUS ABSCESS              | Grade 2                         | 1 (1.1%)     | 1 (1.2%)     | 2 (1.2%)    |
| TINEA INFECTION                   | Grade 2                         | 0 (0.0%)     | 0 (0.0%)     | 0 (0.0%)    |
| TONSILLITIS                       | Grade 2                         | 6 (6.9%)     | 2 (2.4%)     | 8 (4.7%)    |
| TOOTH INJURY                      | Grade 2                         | 1 (1.1%)     | 0 (0.0%)     | 1 (0.6%)    |
| TOOTHACHE                         | Grade 1,2                       | 2 (2.3%)     | 0 (0.0%)     | 2 (1.2%)    |
| UPPER RESPIRATORY TRACT INFECTION | Grade 1,2                       | 5 (5.7%)     | 10 (12.2%)   | 15 (8.9%)   |
| URINARY TRACT INFECTION           | Grade 1,2                       | 5 (5.7%)     | 3 (3.7%)     | 8 (4.7%)    |
| UTERINE PAIN                      | Grade 1                         | 1 (1.1%)     | 1 (1.2%)     | 2 (1.2%)    |
| UTERINE SPASM                     | Grade 1,2                       | 2 (2.3%)     | 0 (0.0%)     | 2 (1.2%)    |
| VAGINAL CANDIDIASIS               | Grade 1,2                       | 18 (20.7%)   | 14 (17.1%)   | 32 (18.9%)  |
| VAGINAL DISCHARGE                 | Grade 1                         | 4 (4.6%)     | 6 (7.3%)     | 10 (5.9%)   |
| VAGINAL ERYTHEMA                  | Grade 1                         | 1 (1.1%)     | 0 (0.0%)     | 1 (0.6%)    |
| VAGINAL INFECTION                 | Grade 2                         | 0 (0.0%)     | 0 (0.0%)     | 0 (0.0%)    |
| VAGINAL LACERATION                | Grade 2                         | 0 (0.0%)     | 1 (1.2%)     | 1 (0.6%)    |
| VAGINAL ODOUR                     | Grade 1                         | 4 (4.6%)     | 0 (0.0%)     | 4 (2.4%)    |
| VAGINAL PAIN                      | Grade 1                         | 0 (0.0%)     | 1 (1.2%)     | 1 (0.6%)    |
| VAGINITIS BACTERIAL               | Grade 1,2                       | 14 (16.1%)   | 9 (11.0%)    | 23 (13.6%)  |
| VIRAL RHINITIS                    | Grade 1                         | 0 (0.0%)     | 1 (1.2%)     | 1 (0.6%)    |
| VULVAL ERYTHEMA                   | Grade 1                         | 1 (1.1%)     | 0 (0.0%)     | 1 (0.6%)    |
| VULVAR EROSION                    | Grade 1                         | 0 (0.0%)     | 1 (1.2%)     | 1 (0.6%)    |
| VULVOVAGINAL DISCOMFORT           | Grade 1                         | 0 (0.0%)     | 3 (3.7%)     | 3 (1.8%)    |
| VULVOVAGINAL DRYNESS              | Grade 1                         | 0 (0.0%)     | 1 (1.2%)     | 1 (0.6%)    |
| VULVOVAGINAL PRURITUS             | Grade 1                         | 2 (2.3%)     | 2 (2.4%)     | 4 (2.4%)    |
| VULVOVAGINITIS TRICHOMONAL        | Grade 1,2                       | 4 (4.6%)     | 0 (0.0%)     | 4 (2.4%)    |

Centre 02: Moshi, Tanzania; Centre 03: Johannesburg, South Africa; Centre 04: Durban, South Africa  
Centre 05: DTHF, Cape Town, South Africa
