# Supplementary material for: Safety of a silicone elastomer vaginal ring as potential microbicide delivery method in African women: A Phase 1 randomized trial
Source: PLoS One. 2018 May 29;13(5):e0196904. doi: 10.1371/journal.pone.0196904 (PMC5973569; doi:10.1371/journal.pone.0196904)
Supplement: S2 Table — (PDF) [file pone.0196904.s004.pdf]

**S2 Table. Prevalence of STIs and Bacterial Vaginosis – ITT Population.**

|             |                     | Observation    |                |                |                |               | Intervention |                |                |                |                |               |         |
|-------------|---------------------|----------------|----------------|----------------|----------------|---------------|--------------|----------------|----------------|----------------|----------------|---------------|---------|
|             | Exams               | Site 2<br>n(%) | Site 3<br>n(%) | Site 4<br>n(%) | Site 5<br>n(%) | Total<br>n(%) |              | Site 2<br>n(%) | Site 3<br>n(%) | Site 4<br>n(%) | Site 5<br>n(%) | Total<br>n(%) | P-value |
| Both Groups |                     |                |                |                |                |               |              |                |                |                |                |               |         |
|             | HIV                 | 0              | 0              | 1 (1)          | 0              | 1 (1)         |              | 0              | 0              | 2 (1)          | 0              | 2 (1)         |         |
|             | Bacterial Vaginosis | 4 (2)          | 8 (5)          | 10 (6)         | 6 (4)          | 28 (17)       |              | 0              | 7 (4)          | 11 (7)         | 2 (1)          | 20 (13)       | 0.178   |
|             | Trichomonas         | 3 (2)          | 6 (4)          | 3 (2)          | 0              | 12 (7)        |              | 0              | 4 (3)          | 5 (3)          | 0              | 9 (6)         | 0.170   |
|             | Gonorrhea           | 0              | 1 (1)          | 2 (1)          | 0              | 3 (2)         |              | 3 (2)          | 2 (1)          | 2 (1)          | 0              | 7 (4)         | 0.356   |
|             | Chlamydia           | 3 (2)          | 6 (4)          | 3 (2)          | 3 (2)          | 15 (9)        |              | 0              | 5 (3)          | 2 (1)          | 1 (1)          | 8 (5)         | 0.497   |
|             | Pregnancy           | 0              | 1 (1)          | 0              | 0              | 1 (1)         |              | 0              | 0              | 0              | 0              | 0             |         |
| Group A     |                     |                |                |                |                |               |              |                |                |                |                |               |         |
|             | HIV                 | 0              | 0              | 1 (1)          | 0              | 1 (1)         |              | 0              | 0              | 1 (1)          | 0              | 1 (1)         |         |
|             | Bacterial Vaginosis | 0              | 2 (3)          | 0              | 1 (1)          | 3 (4)         |              | 0              | 6 (7)          | 11 (13)        | 2 (2)          | 19 (22)       | 0.165   |
|             | Trichomonas         | 1 (1)          | 0              | 1 (1)          | 0              | 2 (3)         |              | 0              | 4 (5)          | 5 (6)          | 0              | 9 (10)        | 0.067   |
|             | Gonorrhea           | 0              | 1 (1)          | 0              | 0              | 1 (1)         |              | 2 (2)          | 1 (1)          | 2 (2)          | 0              | 5 (6)         | 0.301   |
|             | Chlamydia           | 1 (1)          | 4 (5)          | 1 (1)          | 2 (3)          | 8 (10)        |              | 0              | 2 (2)          | 2 (2)          | 1 (1)          | 5 (6)         | 0.630   |
|             | Pregnancy           | 0              | 1 (1)          | 0              | 0              | 1 (1)         |              | 0              | 0              | 0              | 0              | 0             |         |
| Group B     |                     |                |                |                |                |               |              |                |                |                |                |               |         |
|             | HIV                 | 0              | 0              | 0              | 0              | 0             |              | 0              | 0              | 1 (1)          | 0              | 1 (1)         |         |
|             | Bacterial Vaginosis | 4 (5)          | 6 (7)          | 10 (12)        | 5 (6)          | 25 (30)       |              | 0              | 1 (1)          | 0              | 0              | 1 (1)         | 0.420   |
|             | Trichomonas         | 2 (2)          | 6 (7)          | 2 (2)          | 0              | 10 (12)       |              | 0              | 0              | 0              | 0              | 0             |         |
|             | Gonorrhea           | 0              | 0              | 2 (2)          | 0              | 2 (2)         |              | 1 (1)          | 1 (1)          | 0              | 0              | 2 (3)         | 0.135   |
|             | Chlamydia           | 2 (2)          | 2 (2)          | 2 (2)          | 1 (1)          | 7 (9)         |              | 0              | 3 (4)          | 0              | 0              | 3 (4)         | 0.232   |
|             | Pregnancy           | 0              | 0              | 0              | 0              | 0             |              | 0              | 0              | 0              | 0              | 0             |         |

**S2 Table. Prevalence of STIs and Bacterial Vaginosis – PP 1 Population.**

|             |                     | Observation    |                |                |                |               | Intervention |                |                |                |                |               |         |
|-------------|---------------------|----------------|----------------|----------------|----------------|---------------|--------------|----------------|----------------|----------------|----------------|---------------|---------|
|             | Exams               | Site 2<br>n(%) | Site 3<br>n(%) | Site 4<br>n(%) | Site 5<br>n(%) | Total<br>n(%) |              | Site 2<br>n(%) | Site 3<br>n(%) | Site 4<br>n(%) | Site 5<br>n(%) | Total<br>n(%) | P-value |
| Both Groups |                     |                |                |                |                |               |              |                |                |                |                |               |         |
|             | HIV                 | 0              | 0              | 1 (1)          | 0              | 1 (1)         |              | 0              | 0              | 2 (1)          | 0              | 2 (1)         |         |
|             | Bacterial Vaginosis | 4 (3)          | 7 (5)          | 8 (6)          | 4 (3)          | 23 (16)       |              | 0              | 7 (5)          | 11 (7)         | 2 (1)          | 20 (13)       | 0.175   |
|             | Trichomonas         | 3 (2)          | 5 (3)          | 3 (2)          | 0              | 11 (8)        |              | 0              | 3 (2)          | 5 (3)          | 0              | 8 (5)         | 0.164   |
|             | Gonorrhea           | 0              | 1 (1)          | 2 (1)          | 0              | 3 (2)         |              | 3 (2)          | 2 (1)          | 2 (1)          | 0              | 7 (5)         | 0.356   |
|             | Chlamydia           | 2 (1)          | 6 (4)          | 3 (2)          | 3 (2)          | 14 (10)       |              | 0              | 5 (3)          | 2 (1)          | 1 (1)          | 8 (5)         | 0.618   |
|             | Pregnancy           | 0              | 1 (1)          | 0              | 0              | 1 (1)         |              | 0              | 0              | 0              | 0              | 0             |         |
| Group A     |                     |                |                |                |                |               |              |                |                |                |                |               |         |
|             | HIV                 | 0              | 0              | 1 (1)          | 0              | 1 (1)         |              | 0              | 0              | 1 (1)          | 0              | 1 (1)         |         |
|             | Bacterial Vaginosis | 0              | 2 (3)          | 0              | 1 (1)          | 3 (4)         |              | 0              | 6 (7)          | 11 (13)        | 2 (2)          | 19 (23)       | 0.165   |
|             | Trichomonas         | 1 (1)          | 0              | 1 (1)          | 0              | 2 (3)         |              | 0              | 3 (4)          | 5 (6)          | 0              | 8 (10)        | 0.091   |
|             | Gonorrhea           | 0              | 1 (1)          | 0              | 0              | 1 (1)         |              | 2 (2)          | 1 (1)          | 2 (2)          | 0              | 5 (6)         | 0.301   |
|             | Chlamydia           | 1 (1)          | 4 (5)          | 1 (1)          | 2 (3)          | 8 (11)        |              | 0              | 2 (2)          | 2 (2)          | 1 (1)          | 5 (6)         | 0.630   |
|             | Pregnancy           | 0              | 1 (1)          | 0              | 0              | 1 (1)         |              | 0              | 0              | 0              | 0              | 0             |         |
| Group B     |                     |                |                |                |                |               |              |                |                |                |                |               |         |
|             | HIV                 | 0              | 0              | 0              | 0              | 0             |              | 0              | 0              | 1 (1)          | 0              | 1 (1)         |         |
|             | Bacterial Vaginosis | 4 (6)          | 5 (7)          | 8 (12)         | 3 (4)          | 20 (29)       |              | 0              | 1 (1)          | 0              | 0              | 1 (1)         | 0.453   |
|             | Trichomonas         | 2 (3)          | 5 (7)          | 2 (3)          | 0              | 9 (13)        |              | 0              | 0              | 0              | 0              | 0             |         |
|             | Gonorrhea           | 0              | 0              | 2 (3)          | 0              | 2 (3)         |              | 1 (1)          | 1 (1)          | 0              | 0              | 2 (3)         | 0.135   |
|             | Chlamydia           | 1 (1)          | 2 (3)          | 2 (3)          | 1 (1)          | 6 (9)         |              | 0              | 3 (4)          | 0              | 0              | 3 (4)         | 0.308   |
|             | Pregnancy           | 0              | 0              | 0              | 0              | 0             |              | 0              | 0              | 0              | 0              | 0             |         |

**S2 Table. Prevalence of STIs and Bacterial Vaginosis – PP 1 Population.**

|             |                     | Observation    |                |                |                |               | Intervention |                |                |                |                |               |         |
|-------------|---------------------|----------------|----------------|----------------|----------------|---------------|--------------|----------------|----------------|----------------|----------------|---------------|---------|
|             | Exams               | Site 2<br>n(%) | Site 3<br>n(%) | Site 4<br>n(%) | Site 5<br>n(%) | Total<br>n(%) |              | Site 2<br>n(%) | Site 3<br>n(%) | Site 4<br>n(%) | Site 5<br>n(%) | Total<br>n(%) | P-value |
| Both Groups |                     |                |                |                |                |               |              |                |                |                |                |               |         |
|             | HIV                 | 0              | 0              | 0              | 0              | 0             |              | 0              | 0              | 2 (1)          | 0              | 2 (1)         |         |
|             | Bacterial Vaginosis | 4 (3)          | 7 (5)          | 8 (5)          | 4 (3)          | 23 (15)       |              | 0              | 5 (3)          | 11 (8)         | 2 (1)          | 18 (13)       | 0.176   |
|             | Trichomonas         | 3 (2)          | 5 (3)          | 3 (2)          | 0              | 11 (7)        |              | 0              | 2 (1)          | 5 (3)          | 0              | 7 (5)         | 0.129   |
|             | Gonorrhea           | 0              | 1 (1)          | 2 (1)          | 0              | 3 (2)         |              | 3 (2)          | 2 (1)          | 1 (1)          | 0              | 6 (4)         | 0.223   |
|             | Chlamydia           | 2 (1)          | 6 (4)          | 3 (2)          | 3 (2)          | 14 (9)        |              | 0              | 4 (3)          | 1 (1)          | 1 (1)          | 6 (4)         | 0.699   |
|             | Pregnancy           | 0              | 1 (1)          | 0              | 0              | 1 (1)         |              | 0              | 0              | 0              | 0              | 0             |         |
| Group A     |                     |                |                |                |                |               |              |                |                |                |                |               |         |
|             | HIV                 | 0              | 0              | 1 (1)          | 0              | 1 (1)         |              | 0              | 0              | 1 (1)          | 0              | 1 (1)         |         |
|             | Bacterial Vaginosis | 0              | 2 (3)          | 0              | 1 (1)          | 3 (4)         |              | 0              | 6 (7)          | 11 (13)        | 2 (2)          | 19 (22)       | 0.165   |
|             | Trichomonas         | 1 (1)          | 0              | 1 (1)          | 0              | 2 (3)         |              | 0              | 4 (5)          | 5 (6)          | 0              | 9 (10)        | 0.067   |
|             | Gonorrhea           | 0              | 1 (1)          | 0              | 0              | 1 (1)         |              | 2 (2)          | 1 (1)          | 2 (2)          | 0              | 5 (6)         | 0.301   |
|             | Chlamydia           | 1 (1)          | 4 (5)          | 1 (1)          | 2 (3)          | 8 (10)        |              | 0              | 2 (2)          | 2 (2)          | 1 (1)          | 5 (6)         | 0.630   |
|             | Pregnancy           | 0              | 1 (1)          | 0              | 0              | 1 (1)         |              | 0              | 0              | 0              | 0              | 0             |         |
| Group B     |                     |                |                |                |                |               |              |                |                |                |                |               |         |
|             | HIV                 | 0              | 0              | 0              | 0              | 0             |              | 0              | 0              | 1 (1)          | 0              | 1 (1)         |         |
|             | Bacterial Vaginosis | 4 (5)          | 6 (7)          | 10 (12)        | 5 (6)          | 25 (30)       |              | 0              | 1 (1)          | 0              | 0              | 1 (1)         | 0.420   |
|             | Trichomonas         | 2 (2)          | 6 (7)          | 2 (2)          | 0              | 10 (12)       |              | 0              | 0              | 0              | 0              | 0             |         |
|             | Gonorrhea           | 0              | 0              | 2 (2)          | 0              | 2 (2)         |              | 1 (1)          | 1 (1)          | 0              | 0              | 2 (3)         | 0.135   |
|             | Chlamydia           | 2 (2)          | 2 (2)          | 2 (2)          | 1 (1)          | 7 (9)         |              | 0              | 3 (4)          | 0              | 0              | 3 (4)         | 0.232   |
|             | Pregnancy           | 0              | 0              | 0              | 0              | 0             |              | 0              | 0              | 0              | 0              | 0             |         |
